1 **Extended amygdala-parabrachial circuits alter threat assessment to**  
2 **regulate feeding**

3  
4 **Authors:** Dionnet L. Bhatti<sup>1,2,11\*</sup>, Andrew T. Luskin<sup>1,2,4,6,7,8\*</sup>, Christian E. Pedersen<sup>1,2,3,6,7,9</sup>, Bernard  
5 Mulvey<sup>4,5</sup>, Hannah Oden-Brunson<sup>1,2</sup>, Kate Kimbell<sup>1,2</sup>, Abbie Sawyer<sup>10</sup>, Robert W. Gereau IV<sup>1,2,4</sup>,  
6 Joseph D. Dougherty<sup>4,5</sup>, Michael R. Bruchas<sup>1,2,3,4,6,7,8,9,12#</sup>

7  
8 **Affiliations:**

9 1 Department of Anesthesiology, Washington University School of Medicine, St. Louis, MO  
10 63108, USA

11 2 Washington University Pain Center, Washington University School of Medicine, St. Louis, MO  
12 63108, USA

13 3 Department of Biomedical Engineering, Washington University School of Medicine, St.  
14 Louis, MO, 63108 USA

15 4 Division of Biology and Biomedical Sciences, Washington University School of Medicine, St.  
16 Louis, MO, USA.

17 5 Department of Genetics, Washington University School of Medicine, St. Louis, MO, USA.

18 6 Department of Anesthesiology and Pain Medicine, University of Washington, Seattle, WA, USA

19 7 Center for Neurobiology of Addiction, Pain, and Emotion, University of Washington, Seattle,  
20 WA, USA

21 8 Graduate Program in Neuroscience, University of Washington, Seattle, WA, 98195

22 9 Department of Bioengineering, University of Washington, Seattle, WA, 98195

23 10 Department of Electrical Engineering, University of Washington, Seattle, WA, 98195

24 11 Current address: Program in Neuroscience, Harvard Medical School, Boston, MA 02115

25 12 Lead Contact

26 #Corresponding author. Email: [mbruchas@uw.edu](mailto:mbruchas@uw.edu) (M.R.B.)

27 \*these authors contributed equally

28

29 **Abstract:**

30 An animal's evolutionary success depends on the ability to seek and consume foods while  
31 avoiding environmental threats. However, how evolutionarily conserved threat detection circuits  
32 modulate feeding is unknown. In mammals, feeding and threat assessment are strongly  
33 influenced by the parabrachial nucleus (PBN), a structure that responds to threats and inhibits  
34 feeding. Here, we report that the PBN receives dense inputs from the bed nucleus of the stria  
35 terminalis (BNST), an extended amygdala structure that encodes affective information. Using a  
36 series of complementary approaches, we identify opposing BNST-PBN circuits that modulate a  
37 genetically-defined population of PBN neurons to control feeding. This previously unrecognized  
38 neural circuit integrates threat assessment with the intrinsic drive to eat.

39

40 **Keywords:** extended amygdala; bed nucleus of the stria terminalis; parabrachial nucleus;  
41 feeding; threat assessment; anxiety; motivation

42 **Main text:**

43

44 **Introduction**

45 All animals must successfully seek and consume food while avoiding environmental  
46 threats to survive. The internal state of an animal directly impacts the expression of risky  
47 behaviors, such as exploring a dangerous environment to obtain rewards and maintain  
48 homeostasis. Animals must adaptively prioritize certain behaviors to appropriately respond to their  
49 internal state (Alhadeff et al., 2018; Burnett et al., 2016). While many studies have explored the  
50 interaction of metabolic need states with behavior, how mammals integrate affective-threat  
51 assessment with internal need states remains largely unknown.

52 Several recent reports have found that in mammals, food consumption and threat  
53 assessment are heavily influenced by the parabrachial nucleus (PBN), a pontine structure that  
54 integrates visceral and sensory information to encode metabolic needs (Campos et al., 2016,  
55 2018; Carter et al., 2013; Essner et al., 2017; Han et al., 2015; Mu et al., 2017; Roman et al.,  
56 2016; Ryan et al., 2017; Zséli et al., 2016). The amygdala and extended amygdala are  
57 evolutionarily conserved brain regions that encode and integrate valence, stress, and threat to  
58 alter behavioral states. Anatomical data suggest that the PBN receives input from several regions  
59 that may encode affective information, including the bed nucleus of the stria terminalis (BNST), a  
60 structure in the extended amygdala (Douglass et al., 2017; Kim et al., 2013; Mazzone et al., 2018;  
61 Zséli et al., 2016). However, the neural circuit mechanisms that underlie the integration of an  
62 animal's own motivation to eat with internal affective states regarding environmental threats are  
63 still unknown. Here, we identified two previously unknown afferents from distinct populations  
64 within the BNST to the PBN that underlie the complex integration of threat-assessment and  
65 feeding signals to modulate PBN activity and ultimately regulate state-dependent feeding.

66

67

## 68 **Results**

### 69 **Anatomical and Molecular Characterization of Opposing BNST-PBN Circuits**

70 The BNST is a heterogeneous population comprised of glutamatergic, GABAergic, and  
71 peptidergic neurons (Daniel and Rainnie, 2016; Giardino et al., 2018; Gungor and Paré, 2016;  
72 Gungor et al., 2018; Jennings et al., 2013a, 2013b). To determine whether distinct neuronal  
73 circuits from the BNST innervate the PBN to alter feeding behaviors, we injected Cre-inducible  
74 anterograde AAVs expressing channelrhodopsin-2 with an eYFP reporter (AAV5-DIO-ChR2-  
75 eYFP) into the BNST of vesicular GABA transporter (vGAT)-Cre and vesicular glutamate  
76 transporter (vGLUT2)-Cre mice, which revealed robust axonal projections to the PBN from  
77 GABAergic (**Figures 1A and S1F-S1K**) and glutamatergic (**Figure 1D**) BNST neurons. To further  
78 substantiate our anterograde tracing findings, we used Cre-inducible retrograde adeno-  
79 associated viruses (retro-AAV2) expressing an enhanced yellow fluorescent protein (eYFP)  
80 reporter (AAV2retro-DIO-eYFP) (Tervo et al., 2016) into the PBN of vGAT-Cre or vGLUT2-Cre  
81 mice (**Figure S1A**). Retrograde tracing revealed populations of both GABAergic and  
82 glutamatergic BNST neurons that innervate the PBN (**Figure S1A**).

83 We next assessed whether these distinct populations make functional monosynaptic  
84 connections to PBN neurons using *ex vivo* patch-clamp electrophysiology. We collected acute  
85 brain slices containing the PBN from either vGAT-Cre or vGLUT2-Cre mice expressing DIO-  
86 ChR2-eYFP in BNST-PBN projections. We optogenetically evoked post-synaptic currents in PBN  
87 neurons receiving BNST GABAergic (**Figure 1B**) or glutamatergic (**Figure 1E**) innervation during  
88 whole-cell patch clamp recording. Optogenetic activation of GABAergic BNST terminals in the  
89 PBN evoked IPSCs that were pharmacologically blocked using GABA<sub>A</sub> antagonists (**Figure 1C**),  
90 while optogenetic activation of glutamatergic BNST terminals in the PBN evoked EPSCs that were  
91 pharmacologically blocked using AMPAR/NMDAR antagonists (**Figure 1F**). Postsynaptic  
92 currents occurred <5ms after the light pulse, suggesting that both excitatory and inhibitory  
93 connections are monosynaptic (**Figure S1B-E**).

94 We further characterized the molecular expression profiles of these distinct inhibitory and  
95 excitatory BNST-PBN projections by using translating ribosome affinity purification (TRAP) to  
96 determine their translational signature (Doyle et al., 2008). We generated a new Cre-dependent  
97 TRAP construct within the retro-AAV2 vector (AAV2retro-DIO-TRAP) and injected it into the PBN  
98 of vGAT-Cre and vGLUT2-Cre mice to isolate RNA transcripts from each BNST-PBN projection  
99 population with genotype and projection specificity (Parker et al., 2019; Tervo et al., 2016). We  
100 then isolated and sequenced ribosome-bound mRNA from the BNST in each group (**Figures 1G,**  
101 **S2A, and S2B**). The vGAT and vGLUT2 projections are enriched in several genes of interest  
102 (**Figures 1H, 1I, and S2C-S2E**). BNST-PBN<sup>vGAT</sup> neurons are enriched in the neuropeptide  
103 mRNAs *tachykinin 2 (Tac2)* (Zelikowsky et al., 2018) and *galanin (Gal)*, as well as a somatostatin  
104 receptor (*Sstr3*) and *melanocortin-2 receptor accessory protein 2 (Mrap2)*, which play important  
105 roles in limiting anxiety, responses and regulating feeding behavior (Ahrens et al., 2018; Asai et  
106 al., 2013; Bruschetta et al., 2018; Elsilä et al., 2018). BNST-PBN<sup>vGLUT2</sup> neurons are enriched in  
107 *Adcyap1*, which encodes the neuropeptide PACAP, previously identified as a major regulator of  
108 stress responses in the BNST (Hammack et al., 2009; Roman et al., 2014), including in contexts  
109 of addiction and post-traumatic stress disorder (Miles et al., 2018; Ressler et al., 2011). Both  
110 BNST-PBN<sup>vGAT</sup> and BNST-PBN<sup>vGLUT2</sup> neurons express calcitonin receptor (*Calcr*), recently  
111 associated with the regulation of feeding (Cheng et al., 2020; Pan et al., 2018), and *nociceptin*  
112 (*Pnoc*), linked to motivated behaviors including feeding (Hardaway et al., 2019; Parker et al.,  
113 2019; Toll et al., 2016). We further validated these RNAseq findings by performing fluorescent in-  
114 situ hybridization experiments, which revealed co-expression of *Tac2*, *Sstr3*, and *Calcr* with  
115 vGAT and *Adcyap1* with vGLUT2 neurons within the BNST (**Figures S2F-S2I**).

116

### 117 **Feeding and Threat Differentially Engage Excitatory and Inhibitory BNST-PBN Circuits**

118 To determine whether these distinct genetically-defined BNST-PBN circuits modulate  
119 feeding behavior, we used fiber photometry to monitor calcium-mediated fluorescence, a proxy

120 for neuronal activity, of BNST-PBN terminals in freely-behaving mice (Gunaydin et al., 2014;  
121 Pologruto et al., 2004). To determine whether GABAergic BNST-PBN terminals are engaged  
122 during feeding behavior, we targeted AAVDJ-DIO-GCaMP6s to the BNST of vGAT-Cre mice and  
123 positioned optical fibers above the PBN for measurement of BNST-PBN GABAergic terminal  
124 calcium activity (**Figures 2A, 2B, and S3A, S3C, and S3E**). We found that BNST-PBN<sup>vGAT</sup>  
125 GCaMP activity increased as an animal engaged in both sated and hedonic feeding (i.e. sucrose),  
126 as well as in other food seeking modalities including high-fat, food deprived, and normal chow  
127 within novel-anxiogenic environments (**Figures 2C-2K and S3G**). Conversely, to assess whether  
128 glutamatergic input to the PBN is altered during feeding behavior, we targeted AAVDJ-DIO-  
129 GCaMP6s to the BNST of vGLUT2-Cre mice and similarly positioned optical fibers above the PBN  
130 for measurement of BNST-PBN glutamatergic terminal calcium activity (**Figures 3A, 3B, and**  
131 **S3B, S3D, and S3F**). In these experiments, we found that BNST-PBN<sup>vGLUT2</sup> GCaMP activity  
132 decreased when an animal engaged in these same feeding behaviors (**Figures 3C-3K**). Together,  
133 these data suggest a differential opposing role for GABAergic and glutamatergic BNST-PBN  
134 circuits in modulating feeding behavior.

135 Food-seeking requires an alteration of threat assessment and anxiety-like behavior in  
136 order to adaptively seek out and consume food as necessary for survival. We therefore  
137 hypothesized that if these circuits indeed alter feeding behavior concurrently with threat  
138 assessment, GABAergic or glutamatergic BNST-PBN input may be differentially engaged during  
139 aversive threat stimuli, respectively. To assess this, we recorded from BNST-PBN terminals in  
140 vGAT-Cre and vGLUT-Cre mice during the presentation of multiple shock stimuli (**Figure 4A**).  
141 When animals were presented with an aversive shock, BNST-PBN<sup>vGAT</sup> calcium transient activity  
142 rapidly decreased in response (**Figures 4B-4D**), while BNST-PBN<sup>vGLUT2</sup> activity increased  
143 following shock (**Figures 4E-4F**). These observations indicate that inhibitory GABAergic BNST-  
144 PBN circuits may act to diminish threat signaling to engage and allow feeding, while excitatory

145 glutamatergic BNST-PBN circuits could be recruited to enhance threat signaling and suppress  
146 feeding behaviors.

147

### 148 **Excitatory and Inhibitory BNST-PBN Circuit Activation Drive Opposing Feeding Behavior**

149 Since photometry measurements at the terminals revealed that these two opposing BNST-  
150 PBN projections are modulated during feeding and threat responses, we next utilized optogenetic  
151 approaches to assess whether manipulating neural circuit activity of BNST-PBN circuits alters  
152 feeding, threat, and affective valence, and to determine direct causality of this circuit in regulating  
153 behavior. We targeted AAV5-EF1 $\alpha$ -DIO-ChR2 to the BNST of vGAT-Cre or vGLUT2-Cre mice  
154 and positioned optical fibers above the PBN for photo-stimulation of BNST-PBN GABAergic or  
155 glutamatergic terminals (**Figure 5A**). First, we measured food consumption with or without  
156 genetically defined neural circuit photo-activation while mice had free access to different foods  
157 (**Figure 5B**). Activation of ChR2 in BNST-PBN<sup>vGAT</sup> neurons increased food consumption  
158 compared to control mice under sated conditions (**Figure 5C and S4B**). This increase also  
159 occurred with sucrose and high-fat foods (**Figures S4D-S4F**). Furthermore, photoactivation of  
160 BNST-PBN<sup>vGAT</sup> signaling also increased consumption of less-palatable salt-enriched or bitter (i.e.  
161 quinine-enriched) foods (**Figure S4G-S4I**). Notably, this BNST-PBN<sup>vGAT</sup>-mediated increase in  
162 feeding was present when the animal was sated but was not evident after food deprivation (**Figure**  
163 **5C, Figure S4C**). Together, these results suggest that the inhibitory BNST-PBN circuit is sufficient  
164 to drive feeding in sated states, regardless of food type, and likely overrides the valence of the  
165 food. In contrast, we saw a ceiling effect in the food-deprived state, suggesting that inhibitory  
166 BNST-PBN circuits are already engaged, consistent with our fiber photometry data (**Figure S3G**).  
167 Additionally, optogenetic inhibition of the BNST-PBN<sup>vGAT</sup> circuit using Arch3.0 revealed its  
168 necessity for hunger-driven feeding (**Figures S4P-S4R**). In contrast to activation of BNST-  
169 PBN<sup>vGAT</sup>, activation of BNST-PBN<sup>vGLUT2</sup> circuits in a food-deprived state decreased consumption  
170 of normal chow (**Figures 5D and S5A-S5E**), demonstrating that the excitatory BNST-PBN circuit

171 is sufficient to reduce feeding when mice in a food-deprived state, suggesting binary and opposing  
172 BNST-PBN circuits.

173

#### 174 **Excitatory and Inhibitory BNST-PBN Circuit Activation Drive Opposing Affective States**

175 Internal state (affective valence) alters an animal's ability to assess potential threats and  
176 explore different environments, a requirement to locate and consume foods. Therefore, we sought  
177 to assess the affective valence of these distinct BNST-PBN circuits by subjecting mice to real-  
178 time-place-preference (RTPP) tests and operant-reinforcement assays (Al-Hasani et al., 2015;  
179 McCall et al., 2015; Seo et al., 2016). We injected AAV5-EF1 $\alpha$ -DIO-ChR2 into the BNST of vGAT-  
180 Cre or vGLUT2-Cre mice, placing an optic fiber above the PBN, and tested whether stimulation  
181 of this BNST-PBN<sup>vGAT</sup> pathway was reinforcing or aversive. In the RTPP assay, photoactivation  
182 of ChR2 in BNST-PBN<sup>vGAT</sup> neurons resulted in a robust place preference for the photostimulation-  
183 paired side, while photoactivation of ChR2 in BNST-PBN<sup>vGLUT2</sup> neurons resulted in a robust place  
184 aversion for the photostimulation-paired side, as compared to controls (**Figures 5E and 5F**). In  
185 an operant self-stimulation paradigm, photoactivation of BNST-PBN<sup>vGAT</sup> neurons significantly  
186 increased the number of nose pokes for self-stimulation relative to controls (**Figure 5H**),  
187 demonstrating that BNST-PBN<sup>vGAT</sup> stimulation is positively reinforcing. Conversely,  
188 photoactivation of BNST-PBN<sup>vGLUT2</sup> neurons significantly increased the number of nose pokes  
189 mice performed to turn off photostimulation (**Figures 5I and 5F**), demonstrating that BNST-  
190 PBN<sup>vGLUT2</sup> stimulation is negatively reinforcing. These data indicate that activation of GABAergic  
191 and glutamatergic BNST-PBN circuits have innate positive and negative affective valence,  
192 respectively (Namburi et al., 2016).

193 To assess whether BNST-PBN circuits modulate threat-assessment, we tested mice in  
194 the elevated zero maze (EZM), which measures anxiety-like behaviors and exploration in a novel  
195 brightly lit anxiogenic context (McCall et al., 2015). When EZM experiments were conducted in a  
196 brightly lit aversive setting, mice with photoactivation of BNST-PBN<sup>vGAT</sup> neurons spent more time



197 in the open arms compared to controls (**Figures 5J, S4K, and S4L**), consistent with increased  
198 exploratory drive. In contrast, mice with photoactivation of BNST-PBN<sup>vGLUT2</sup> neurons showed  
199 decreased exploration of the open arms (**Figure 5K**), indicating that stimulation of this circuit is  
200 sufficient to reduce exploration of an anxiogenic environment. As a further test of whether BNST-  
201 PBN<sup>vGAT</sup> activation can suppress defensive behaviors associated with threat, we subjected mice  
202 to threat-conditioning and measured their defensive response (freezing) to a conditioned stimulus.  
203 Mice were trained to associate a conditioned stimulus (tone) with a highly aversive unconditioned  
204 stimulus (0.7 mA, 2-s footshock). Photostimulation of BNST-PBN<sup>vGAT</sup> neurons robustly reduced  
205 the defensive responses to the conditioned stimulus (**Figures 5L and 5M**). These data indicate  
206 that BNST-PBN circuits are sufficient and necessary for regulating opposing behavioral states  
207 including anxiety and threat within the context of feeding behavior.

208

### 209 **pDyn-expressing PBN neurons receive BNST input and alter feeding and affective behavior**

210 We next aimed to determine the specific targets of BNST<sup>vGAT</sup> and BNST<sup>vGLUT2</sup> projections  
211 in the PBN. Previous studies have identified diverse neuronal populations within the primarily  
212 glutamatergic PBN (Carter et al., 2013; Geerling et al., 2015; Miller et al., 2011; Ryan et al., 2017).  
213 Here we examined dynorphin (pDyn) neurons, previously shown to regulate thermoregulation  
214 (Cintron-Colon et al., 2019; Geerling et al., 2015), and CGRP neurons (Campos et al., 2016;  
215 Carter et al., 2013; Han et al., 2015), shown to function as a general alarm system that responds  
216 to threats and inhibits feeding when activated. In-situ hybridization experiments demonstrated  
217 that pDyn neurons and CGRP neurons form genetically and anatomically distinct populations in  
218 the PBN (**Figures 6A and 6B**). Using a transynaptic rabies tracing method (Beier et al., 2015;  
219 Schwarz et al., 2015; Wickersham et al., 2007), we found that BNST neurons indeed form  
220 monosynaptic connections with pDyn-expressing neurons in the PBN (**Figures 6C-6E**) and may  
221 therefore be a critical downstream node for the behavioral effects of inhibitory and excitatory  
222 BNST-PBN inputs.

223 We targeted dynorphin-expressing PBN neurons in pDyn-Cre mice with AAV5-EF1 $\alpha$ -DIO-  
224 ChR2 and subjected the mice to a both feeding and affective behavioral tests (**Figures 6F and**  
225 **6G**). Consistent with the effects of excitatory BNST-PBN activation, we found that  
226 photostimulation of PBN<sup>pDyn</sup> produces a robust real-time place aversion (**Figures 6H-6J, S6A,**  
227 **and S6B**) and reduced feeding when animals were in a food-deprived state (**Figures 6K and**  
228 **S6C**). Additionally, inhibition of the broader PBN<sup>vGLUT2</sup> population rapidly and reversibly increased  
229 food consumption (**Figures S6D and S6E**). Likewise, chemogenetic inhibition of PBN<sup>pDyn</sup> neurons  
230 using the hm4Di DREADD strategy (Armbruster et al., 2007) decreased the latency to consume  
231 food in an anxiogenic environment and increased overall food consumption in mice expressing  
232 the inhibitory DREADD when given CNO compared to saline, while control animals did not differ  
233 between treatments (**Figure 6L-6P**). Consistent with this finding, the inhibition of PBN<sup>pDyn</sup> neurons  
234 produced anxiolytic behavior in an EZM test (**Figure 6Q**). These data reveal a previously  
235 unrecognized functional role of PBN<sup>pDyn</sup> neurons as primary integrators of BNST afferents that  
236 coordinate feeding drive with threat assessment.

237

## 238 **Discussion**

239 These studies indicate that discrete and opposing neural circuitry from the BNST to the  
240 PBN integrates internal states, threat assessment, and feeding behavior. The BNST has been  
241 shown to be involved in numerous functions related to threats and motivated behaviors (Lebow  
242 and Chen, 2016), and our findings demonstrate that the BNST conveys sensory and affective  
243 information to the PBN to alter behavior critical to an animal's survival.

244 Recent studies have demonstrated BNST input to the PBN and revealed that BNST  
245 neurons may influence respiration and anxiety via increased metabolic activity in the parabrachial  
246 nucleus (Kim et al., 2013; Mazzone et al., 2018). Nonetheless, studies to date had not determined  
247 the identity of these projections. Employing the use of genetic targeting in our study, we unveil a  
248 separable role for discrete genetically-defined BNST-PBN projections. We also identify the

249 complement of mRNAs actively translated by PBN-projecting BNST neurons in a cell-type specific  
250 manner, revealing several peptides and receptors that may act as neuromodulatory regulators  
251 influencing affect and feeding (**Figures 1G-1I**). Notably, these peptides and receptors provide an  
252 entryway to follow up studies and the development of new therapeutic strategies for treating  
253 feeding and affective diseases including obesity, generalized anxiety, and depression. Future  
254 studies employing Cre driver lines and pharmacological approaches will be critical to dissect the  
255 neuropeptide and receptor systems influencing these complex anxiety-like and feeding behaviors.

256 In this study, we also probe the neural dynamics and functional roles of opposing BNST-  
257 PBN circuits using fiber photometry together with optogenetics. Our results reveal that the  
258 GABAergic BNST-PBN circuit is engaged by and drives feeding behavior and exploration, while  
259 the glutamatergic BNST-PBN circuit is disengaged during feeding and suppresses state-  
260 dependent feeding and exploration (**Figures 2-5**). Interestingly, the distinct circuits begin  
261 increasing or decreasing their activity prior to the consumption itself, suggesting that the circuit is  
262 not only encoding the consumption but the appetitive behavior as well. Furthermore, we  
263 demonstrate that these opposing inhibitory and excitatory circuits act to drive these behaviors  
264 partly via the attribution of valence inherent to the circuit itself (**Figure 5**). Further studies exploring  
265 both acute and learned threat detection with opposing feeding states will be needed to explore  
266 how these circuits adapt under various environmental influences. Here we demonstrate that  
267 activation of these circuits is sufficient to alter feeding, exploration, and threat assessment. Given  
268 that eating disorders are highly associated with varying affective states (Hardaway et al., 2015),  
269 further investigation of these circuits under varying affective states imposed by external adverse  
270 experiences such as pain or stress is necessary to fully understand the extent of their involvement.

271 The PBN consists of many cell-types that may mediate separable aspects of feeding and  
272 aversion (Campos et al., 2018; Fu et al., 2019; Park et al., 2020; Ryan et al., 2017). Of these cell-  
273 types, neurons expressing calcitonin gene-related peptide (CGRP) located in the ventral/external  
274 lateral parabrachial (PBNel) thought to function as a general alarm system that sends aversive

275 signals throughout the brain are of the most notable (Palmiter, 2018). However, our results  
276 demonstrate that GABAergic and glutamatergic BNST terminals are most dense in the  
277 dorsolateral and medial regions of the PBN and lacking in the ventrolateral region where CGRP  
278 neurons reside (**Figures 1A, 1D, 6A, 6B, and S1A**). This was both interesting and surprising to  
279 us because this reveals that although CGRP neurons mediate feeding and aversion, they are not  
280 the sole neuropeptide population in the PBN mediating these behaviors. In our studies, we have  
281 demonstrated that dynorphin-expressing neurons located in the dorsolateral PBN (PBN<sup>pDyn</sup>) are  
282 also critically poised as functional mediators of feeding and affective behaviors (Bhatti et al.,  
283 2018). Additionally, recent studies seem to suggest that PBN<sup>pDyn</sup> may communicate with CGRP  
284 neurons in response to noxious pain stimuli (Chiang et al., 2019). Prior to this study, the primary  
285 function for PBN<sup>pDyn</sup> was thought to be for thermoregulation (Cintron-Colon et al., 2019; Geerling  
286 et al., 2015). Altogether, these studies with our results suggest that a primary role for PBN<sup>pDyn</sup> is  
287 to integrate internal states including threat assessment, anxiety, thermoregulation, or pain, in  
288 order to adaptively seek and consume or avoid food.

289 Here we present two opposing neural circuits from the BNST to the PBN that mediate  
290 threat-assessment, exploration, and feeding behaviors in part via their connections to dynorphin-  
291 expressing PBN neurons. Our results implicate these circuits, neuropeptide candidates, and both  
292 inhibitory and excitatory BNST neurons as critical integrators with the PBN for adaptive and  
293 affective behaviors necessary for survival. These findings may provide new avenues for the  
294 development of unique strategies to mitigate maladaptive behaviors related to eating patterns or  
295 affective state.

296

297

298

299 **References:**

- 300 Ahrens, S., Wu, M.V., Furlan, A., Hwang, G.-R., Paik, R., Li, H., Penzo, M.A., Tollkuhn, J., and  
301 Li, B. (2018). A Central Extended Amygdala Circuit That Modulates Anxiety. *J. Neurosci.* **38**,  
302 5567–5583.
- 303 Alhadeff, A.L., Su, Z., Hernandez, E., Klima, M.L., Phillips, S.Z., Holland, R.A., Guo, C.,  
304 Hantman, A.W., De Jonghe, B.C., and Betley, J.N. (2018). A Neural Circuit for the Suppression  
305 of Pain by a Competing Need State. *Cell* **173**, 140-152.e15.
- 306 Al-Hasani, R., McCall, J.G., Shin, G., Gomez, A.M., Schmitz, G.P., Bernardi, J.M., Pyo, C.-O.,  
307 Park, S.I., Marcinkiewicz, C.M., Crowley, N.A., et al. (2015). Distinct Subpopulations of Nucleus  
308 Accumbens Dynorphin Neurons Drive Aversion and Reward. *Neuron* **87**, 1063–1077.
- 309 Armbruster, B.N., Li, X., Pausch, M.H., Herlitze, S., and Roth, B.L. (2007). Evolving the lock to  
310 fit the key to create a family of G protein-coupled receptors potentially activated by an inert ligand.  
311 *Proc Natl Acad Sci U S A* **104**, 5163–5168.
- 312 Asai, M., Ramachandrapa, S., Joachim, M., Shen, Y., Zhang, R., Nuthalapati, N.,  
313 Ramanathan, V., Strohlic, D.E., Ferket, P., Linhart, K., et al. (2013). Loss of Function of the  
314 Melanocortin 2 Receptor Accessory Protein 2 Is Associated with Mammalian Obesity. *Science*  
315 **341**, 275–278.
- 316 Beier, K.T., Steinberg, E.E., DeLoach, K.E., Xie, S., Miyamichi, K., Schwarz, L., Gao, X.J.,  
317 Kremer, E.J., Malenka, R.C., and Luo, L. (2015). Circuit Architecture of VTA Dopamine Neurons  
318 Revealed by Systematic Input-Output Mapping. *Cell* **162**, 622–634.
- 319 Bhatti, D.L., Luskin, A.T., Pedersen, C.E., Kimbell, K., Oden-Brunson, H., Gereau, R.W., and  
320 Bruchas, M.R. (2018). Extended amygdala-parabrachial circuits alter threat perception and  
321 encode homeostatic and hedonic feeding (Society for Neuroscience, San Diego, CA).
- 322 Bruschetta, G., Kim, J.D., Diano, S., and Chan, L.F. (2018). Overexpression of melanocortin 2  
323 receptor accessory protein 2 (MRAP2) in adult paraventricular MC4R neurons regulates energy  
324 intake and expenditure. *Molecular Metabolism* **18**, 79–87.
- 325 Burnett, C.J., Li, C., Webber, E., Tsaousidou, E., Xue, S.Y., Brüning, J.C., and Krashes, M.J.  
326 (2016). Hunger-Driven Motivational State Competition. *Neuron* **92**, 187–201.
- 327 Campos, C.A., Bowen, A.J., Schwartz, M.W., and Palmiter, R.D. (2016). Parabrachial CGRP  
328 Neurons Control Meal Termination. *Cell Metabolism* **23**, 811–820.
- 329 Campos, C.A., Bowen, A.J., Roman, C.W., and Palmiter, R.D. (2018). Encoding of danger by  
330 parabrachial CGRP neurons. *Nature* **555**, 617–622.
- 331 Carter, M.E., Soden, M.E., Zweifel, L.S., and Palmiter, R.D. (2013). Genetic identification of a  
332 neural circuit that suppresses appetite. *Nature* **503**, 111–114.
- 333 Cheng, W., Gonzalez, I., Pan, W., Tsang, A.H., Adams, J., Ndoka, E., Gordian, D., Khoury, B.,  
334 Roelofs, K., Evers, S.S., et al. (2020). Calcitonin Receptor Neurons in the Mouse Nucleus  
335 Tractus Solitarius Control Energy Balance via the Non-aversive Suppression of Feeding. *Cell*  
336 *Metabolism*.

- 337 Chiang, M.C., Nguyen, E.K., Papale, A.E., and Ross, S.E. (2019). Divergent neural pathways  
338 emanating from the lateral parabrachial nucleus mediate distinct components of the pain  
339 response. *BioRxiv* 602466.
- 340 Cintron-Colon, R., Johnson, C.W., Montenegro-Burke, J.R., Guijas, C., Faulhaber, L., Sanchez-  
341 Alavez, M., Aguirre, C.A., Shankar, K., Singh, M., Galmozzi, A., et al. (2019). Activation of  
342 Kappa Opioid Receptor Regulates the Hypothermic Response to Calorie Restriction and Limits  
343 Body Weight Loss. *Current Biology* 29, 4291-4299.e4.
- 344 Daniel, S.E., and Rainnie, D.G. (2016). Stress Modulation of Opposing Circuits in the Bed  
345 Nucleus of the Stria Terminalis. *Neuropsychopharmacology* 41, 103–125.
- 346 Douglass, A.M., Kucukdereli, H., Ponserre, M., Markovic, M., Gründemann, J., Strobel, C.,  
347 Morales, P.L.A., Conzelmann, K.-K., Lüthi, A., and Klein, R. (2017). Central amygdala circuits  
348 modulate food consumption through a positive-valence mechanism. *Nature Neuroscience* 20,  
349 1384–1394.
- 350 Doyle, J.P., Dougherty, J.D., Heiman, M., Schmidt, E.F., Stevens, T.R., Ma, G., Bupp, S.,  
351 Shrestha, P., Shah, R.D., Doughty, M.L., et al. (2008). Application of a Translational Profiling  
352 Approach for the Comparative Analysis of CNS Cell Types. *Cell* 135, 749–762.
- 353 Elsilä, L., De Miguel, E., and Korpi, E.R. (2018). P.2.036 - Somatostatin-expressing neurons in  
354 the bed nucleus of stria terminalis in anxiety- and addiction-related behaviours in mice.  
355 *European Neuropsychopharmacology* 28, S49.
- 356 Essner, R.A., Smith, A.G., Jamnik, A.A., Ryba, A.R., Trutner, Z.D., and Carter, M.E. (2017).  
357 AgRP Neurons Can Increase Food Intake during Conditions of Appetite Suppression and Inhibit  
358 Anorexigenic Parabrachial Neurons. *J. Neurosci.* 37, 8678–8687.
- 359 Fu, O., Iwai, Y., Kondoh, K., Misaka, T., Minokoshi, Y., and Nakajima, K. (2019). SatB2-  
360 Expressing Neurons in the Parabrachial Nucleus Encode Sweet Taste. *Cell Reports* 27, 1650-  
361 1656.e4.
- 362 Geerling, J.C., Kim, M., Mahoney, C.E., Abbott, S.B.G., Agostinelli, L.J., Garfield, A.S., Krashes,  
363 M.J., Lowell, B.B., and Scammell, T.E. (2015). Genetic identity of thermosensory relay neurons  
364 in the lateral parabrachial nucleus. *American Journal of Physiology-Regulatory, Integrative and*  
365 *Comparative Physiology* 310, R41–R54.
- 366 Giardino, W.J., Eban-Rothschild, A., Christoffel, D.J., Li, S.-B., Malenka, R.C., and Lecea, L. de  
367 (2018). Parallel circuits from the bed nuclei of stria terminalis to the lateral hypothalamus drive  
368 opposing emotional states. *Nature Neuroscience* 21, 1084–1095.
- 369 Gunaydin, L.A., Grosenick, L., Finkelstein, J.C., Kauvar, I.V., Fenno, L.E., Adhikari, A., Lammel,  
370 S., Mirzabekov, J.J., Airan, R.D., Zalocusky, K.A., et al. (2014). Natural Neural Projection  
371 Dynamics Underlying Social Behavior. *Cell* 157, 1535–1551.
- 372 Gungor, N.Z., and Paré, D. (2016). Functional Heterogeneity in the Bed Nucleus of the Stria  
373 Terminalis. *J. Neurosci.* 36,  
374 8038–8049.

- 375 Gungor, N.Z., Yamamoto, R., and Pare, D. (2018). Glutamatergic and gabaergic ventral BNST  
376 neurons differ in their physiological properties and responsiveness to noradrenaline.  
377 *Neuropsychopharmacology* 43, 2126.
- 378 Hammack, S.E., Cheung, J., Rhodes, K.M., Schutz, K.C., Falls, W.A., Braas, K.M., and May, V.  
379 (2009). Chronic stress increases pituitary adenylate cyclase-activating peptide (PACAP) and  
380 brain-derived neurotrophic factor (BDNF) mRNA expression in the bed nucleus of the stria  
381 terminalis (BNST): Roles for PACAP in anxiety-like behavior. *Psychoneuroendocrinology* 34,  
382 833–843.
- 383 Han, S., Soleiman, M.T., Soden, M.E., Zweifel, L.S., and Palmiter, R.D. (2015). Elucidating an  
384 Affective Pain Circuit that Creates a Threat Memory. *Cell* 162, 363–374.
- 385 Hardaway, J.A., Crowley, N.A., Bulik, C.M., and Kash, T.L. (2015). Integrated circuits and  
386 molecular components for stress and feeding: implications for eating disorders. *Genes, Brain  
387 and Behavior* 14, 85–97.
- 388 Hardaway, J.A., Halladay, L.R., Mazzone, C.M., Pati, D., Bloodgood, D.W., Kim, M., Jensen, J.,  
389 DiBerto, J.F., Boyt, K.M., Shiddapur, A., et al. (2019). Central Amygdala Prepronociceptin-  
390 Expressing Neurons Mediate Palatable Food Consumption and Reward. *Neuron* 102, 1037-  
391 1052.e7.
- 392 Jennings, J.H., Sparta, D.R., Stamatakis, A.M., Ung, R.L., Pleil, K.E., Kash, T.L., and Stuber,  
393 G.D. (2013a). Distinct extended amygdala circuits for divergent motivational states. *Nature* 496,  
394 224–228.
- 395 Jennings, J.H., Rizzi, G., Stamatakis, A.M., Ung, R.L., and Stuber, G.D. (2013b). The inhibitory  
396 circuit architecture of the lateral hypothalamus orchestrates feeding. *Science* 341, 1517–1521.
- 397 Kim, S.-Y., Adhikari, A., Lee, S.Y., Marshell, J.H., Kim, C.K., Mallory, C.S., Lo, M., Pak, S.,  
398 Mattis, J., Lim, B.K., et al. (2013). Diverging neural pathways assemble a behavioural state from  
399 separable features in anxiety. *Nature* 496, 219–223.
- 400 Lebow, M.A., and Chen, A. (2016). Overshadowed by the amygdala: the bed nucleus of the  
401 stria terminalis emerges as key to psychiatric disorders. *Mol Psychiatry* 21, 450–463.
- 402 Mazzone, C.M., Pati, D., Michaelides, M., DiBerto, J., Fox, J.H., Tipton, G., Anderson, C., Duffy,  
403 K., McKlveen, J.M., Hardaway, J.A., et al. (2018). Acute engagement of G<sub>q</sub>-mediated signaling  
404 in the bed nucleus of the stria terminalis induces anxiety-like behavior. *Molecular Psychiatry* 23,  
405 143–153.
- 406 McCall, J.G., Al-Hasani, R., Siuda, E.R., Hong, D.Y., Norris, A.J., Ford, C.P., and Bruchas, M.R.  
407 (2015). CRH Engagement of the Locus Coeruleus Noradrenergic System Mediates Stress-  
408 Induced Anxiety. *Neuron* 87, 605–620.
- 409 Miles, O.W., Thrailkill, E.A., Linden, A.K., May, V., Bouton, M.E., and Hammack, S.E. (2018).  
410 Pituitary Adenylate Cyclase-Activating Peptide in the Bed Nucleus of the Stria Terminalis  
411 Mediates Stress-Induced Reinstatement of Cocaine Seeking in Rats. *Neuropsychopharmacol.*  
412 43, 978–986.

- 413 Miller, R.L., Stein, M.K., and Loewy, A.D. (2011). Serotonergic inputs to FoxP2 neurons of the  
414 pre-locus coeruleus and parabrachial nuclei that project to the ventral tegmental area.  
415 *Neuroscience* 193, 229–240.
- 416 Mu, D., Deng, J., Liu, K.-F., Wu, Z.-Y., Shi, Y.-F., Guo, W.-M., Mao, Q.-Q., Liu, X.-J., Li, H., and  
417 Sun, Y.-G. (2017). A central neural circuit for itch sensation. *Science* 357, 695–699.
- 418 Namburi, P., Al-Hasani, R., Calhoon, G.G., Bruchas, M.R., and Tye, K.M. (2016). Architectural  
419 Representation of Valence in the Limbic System. *Neuropsychopharmacology* 41, 1697–1715.
- 420 Palmiter, R.D. (2018). The Parabrachial Nucleus: CGRP Neurons Function as a General Alarm.  
421 *Trends in Neurosciences* 41, 280–293.
- 422 Pan, W., Adams, J.M., Allison, M.B., Patterson, C., Flak, J.N., Jones, J., Strohbehn, G.,  
423 Trevaskis, J., Rhodes, C.J., Olson, D.P., et al. (2018). Essential Role for Hypothalamic  
424 Calcitonin Receptor–Expressing Neurons in the Control of Food Intake by Leptin. *Endocrinology*  
425 159, 1860–1872.
- 426 Park, S., Williams, K.W., Liu, C., and Sohn, J.-W. (2020). A neural basis for tonic suppression of  
427 sodium appetite. *Nature Neuroscience* 1–10.
- 428 Parker, K.E., Pedersen, C.E., Gomez, A.M., Spangler, S.M., Walicki, M.C., Feng, S.Y., Stewart,  
429 S.L., Otis, J.M., Al-Hasani, R., McCall, J.G., et al. (2019). A Paranigral VTA Nociceptin Circuit  
430 that Constrains Motivation for Reward. *Cell* 178, 653-671.e19.
- 431 Pologruto, T.A., Yasuda, R., and Svoboda, K. (2004). Monitoring Neural Activity and [Ca<sup>2+</sup>] with  
432 Genetically Encoded Ca<sup>2+</sup> Indicators. *J. Neurosci.* 24, 9572–9579.
- 433 Ressler, K.J., Mercer, K.B., Bradley, B., Jovanovic, T., Mahan, A., Kerley, K., Norrholm, S.D.,  
434 Kilaru, V., Smith, A.K., Myers, A.J., et al. (2011). Post-traumatic stress disorder is associated  
435 with PACAP and the PAC1 receptor. *Nature* 470, 492–497.
- 436 Roman, C.W., Lezak, K.R., Hartsock, M.J., Falls, W.A., Braas, K.M., Howard, A.B., Hammack,  
437 S.E., and May, V. (2014). PAC1 receptor antagonism in the bed nucleus of the stria terminalis  
438 (BNST) attenuates the endocrine and behavioral consequences of chronic stress.  
439 *Psychoneuroendocrinology* 47, 151–165.
- 440 Roman, C.W., Derkach, V.A., and Palmiter, R.D. (2016). Genetically and functionally defined  
441 NTS to PBN brain circuits mediating anorexia. *Nat Commun* 7, 1–11.
- 442 Ryan, P.J., Ross, S.I., Campos, C.A., Derkach, V.A., and Palmiter, R.D. (2017). Oxytocin-  
443 receptor-expressing neurons in the parabrachial nucleus regulate fluid intake. *Nature*  
444 *Neuroscience* 20, 1722–1733.
- 445 Schwarz, L.A., Miyamichi, K., Gao, X.J., Beier, K.T., Weissbourd, B., DeLoach, K.E., Ren, J.,  
446 Ibanes, S., Malenka, R.C., Kremer, E.J., et al. (2015). Viral-genetic tracing of the input–output  
447 organization of a central noradrenaline circuit. *Nature* 524, 88–92.
- 448 Seo, D., Funderburk, S.C., Bhatti, D.L., Motard, L.E., Newbold, D., Girven, K.S., McCall, J.G.,  
449 Krashes, M., Sparta, D.R., and Bruchas, M.R. (2016). A GABAergic Projection from the



- 450 Centromedial Nuclei of the Amygdala to Ventromedial Prefrontal Cortex Modulates Reward  
451 Behavior. *J. Neurosci.* 36, 10831–10842.
- 452 Tervo, D.G.R., Hwang, B.-Y., Viswanathan, S., Gaj, T., Lavzin, M., Ritola, K.D., Lindo, S.,  
453 Michael, S., Kuleshova, E., Ojala, D., et al. (2016). A Designer AAV Variant Permits Efficient  
454 Retrograde Access to Projection Neurons. *Neuron* 92, 372–382.
- 455 Toll, L., Bruchas, M.R., Calo', G., Cox, B.M., and Zaveri, N.T. (2016). Nociceptin/Orphanin FQ  
456 Receptor Structure, Signaling, Ligands, Functions, and Interactions with Opioid Systems.  
457 *Pharmacol Rev* 68, 419–457.
- 458 Wickersham, I.R., Lyon, D.C., Barnard, R.J.O., Mori, T., Finke, S., Conzelmann, K.-K., Young,  
459 J.A.T., and Callaway, E.M. (2007). Monosynaptic Restriction of Transsynaptic Tracing from  
460 Single, Genetically Targeted Neurons. *Neuron* 53, 639–647.
- 461 Zelikowsky, M., Hui, M., Karigo, T., Choe, A., Yang, B., Blanco, M.R., Beadle, K., Gradinaru, V.,  
462 Deverman, B.E., and Anderson, D.J. (2018). The Neuropeptide Tac2 Controls a Distributed  
463 Brain State Induced by Chronic Social Isolation Stress. *Cell* 173, 1265-1279.e19.
- 464 Zséli, G., Vida, B., Martinez, A., Lechan, R.M., Khan, A.M., and Fekete, C. (2016). Elucidation of  
465 the anatomy of a satiety network: Focus on connectivity of the parabrachial nucleus in the adult  
466 rat. *Journal of Comparative Neurology* 524, 2803–2827.

467  
468 **Acknowledgments:** We thank Lamley Lawson, Dylan Blumenthal, Michelle Chung, and Taylor  
469 Hobbs for animal colony maintenance; the Bruchas laboratory and UW NAPE Center for helpful  
470 discussions; Jordan G. McCall and Bryan A. Copits for assistance with electrophysiology. We  
471 thank Richard Palmiter (HHMI, UW) for thoughtful discussion and critiques regarding the  
472 manuscript. **Funding:** This study was supported by the National Institute on Mental Health  
473 (M.R.B., R01- MH112355), the National Institute on Drug Abuse (M.R.B., R01-DA033396), the  
474 National Institute of Neurological Disorders and Stroke (R.W.G., R56-NS048602, R01-  
475 NS106953), the National Institute of General Medical Sciences (A.T.L., T32GM008151), and  
476 National Institute of Mental Health (B.M., F30-MH116654, J.D.D., U01-MH109133). Sequencing  
477 of TRAP samples was made possible in part by Grant Number UL1-RR024992 from the NIH-  
478 National Center for Research Resources (NCRR). **Author contributions:** D.L.B., A.T.L., and  
479 M.R.B. conceptualized and designed the entire study. D.L.B., A.T.L., C.E.P., K.K., H.O.B., and  
480 A.S. performed stereotaxic surgeries, behavioral experiments, and histology. D.L.B. performed  
481 electrophysiological experiments. A.T.L. and C.E.P. performed fiber photometry experiments.

482 A.T.L. and B.M. performed RNA sequencing experiments. D.L.B., A.T.L., C.E.P, and B.M.  
483 performed statistical analysis. D.L.B., A.T.L., and M.R.B. made the figures. D.L.B., A.T.L., and  
484 M.R.B. wrote the manuscript with collective input from all authors. J.D.D. supervised RNA  
485 sequencing experiments. R.W.G. supervised electrophysiological experiments. M.R.B.  
486 supervised the entire study. **Competing Interests:** Although there are no studies we report here  
487 that are related, for full disclosure, Dr. Michael R. Bruchas is a co-founder and consultant for  
488 Neurolux, Inc, a neurotechnology company. J.D.D has previously received royalties related to the  
489 TRAP methodology. **Data and materials:** All data are available in the manuscript or the  
490 supplementary materials. RNA sequencing data is deposited in in the NCBI Gene Expression  
491 Omnibus (GEO) database with accession number GSE133484. We thank Chris Stander, K.  
492 Deisseroth, the Washington University HOPE Vector Core, and the University of North Carolina  
493 (UNC) Vector Core for viral constructs, prep and packaging.

# FIGURE 1

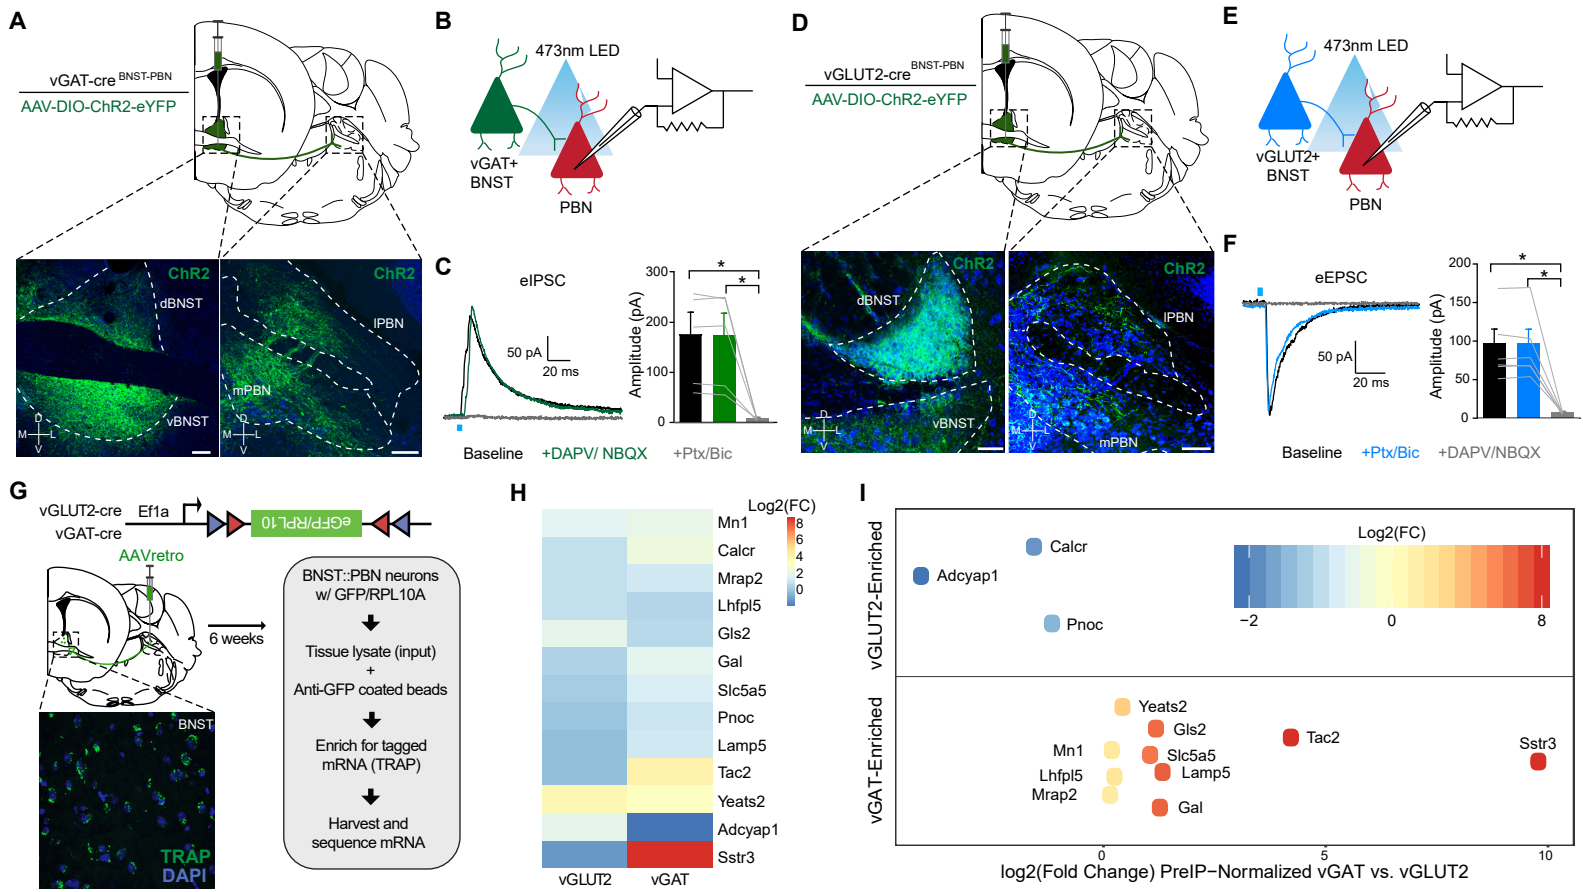

494 **Figure 1. Anatomical and molecular characterization of opposing BNST-PBN circuits.**

495 **(A)** Schematic of viral injection and representative image depicting expression in BNST<sup>vGAT</sup> soma  
496 and their terminals in the PBN (scale bar: 100  $\mu$ m). Blue = Nissl. Green = eYFP.

497 **(B)** Schematic of whole-cell patch clamp electrophysiology recordings of optically-evoked IPSCs.

498 **(C)** Optogenetic activation of BNST<sup>vGAT</sup> terminals elicit IPSCs in PBN neurons that are abolished  
499 by GABA<sub>A</sub> receptor antagonism (n=5 cells, 4 mice).

500 **(D)** Schematic of viral injection and representative image depicting expression in BNST<sup>vGLUT2</sup>  
501 soma and their terminals in the PBN (scale bar: 100  $\mu$ m). Blue = Nissl. Green = eYFP.

502 **(E)** Schematic of whole-cell patch clamp electrophysiology recordings of optically-evoked EPSCs.

503 **(F)** Optogenetic activation of BNST<sup>vGLUT2</sup> terminals elicit EPSCs in PBN neurons that are  
504 abolished by AMPA/NMDA receptor antagonism (n=6 cells, 5 mice).

505 **(G)** Cartoon of injection of TRAP into PBN of vGLUT2-Cre or vGAT-Cre animals. Tagged mRNA  
506 was extracted from the BNST and sequenced. Inset: representative image of TRAP-GFP  
507 expression in BNST.

508 **(H)** Heatmap of transcripts enriched in either vGAT or vGLUT2 projections from BNST to PBN  
509 over input homogenate (pre-IP) (n=3 vGLUT2-Cre samples; n=2 vGAT-Cre samples).

510 **(I)** Transcripts enriched in either vGAT or vGLUT2 projections from BNST to PBN, after  
511 normalization to respective input (pre-IP) homogenates. Positive Log<sub>2</sub>(FC) values indicate  
512 transcript enrichment in BNST-PBN<sup>vGAT</sup> neurons relative to BNST-PBN<sup>vGLUT2</sup> neurons;  
513 negative Log<sub>2</sub>(FC) values indicate relative enrichment in BNST-PBN<sup>vGLUT2</sup> neurons.

514 \**p* < 0.05. Error bars indicate SEM.

515 See also Figure S1 and S2.

# FIGURE 2

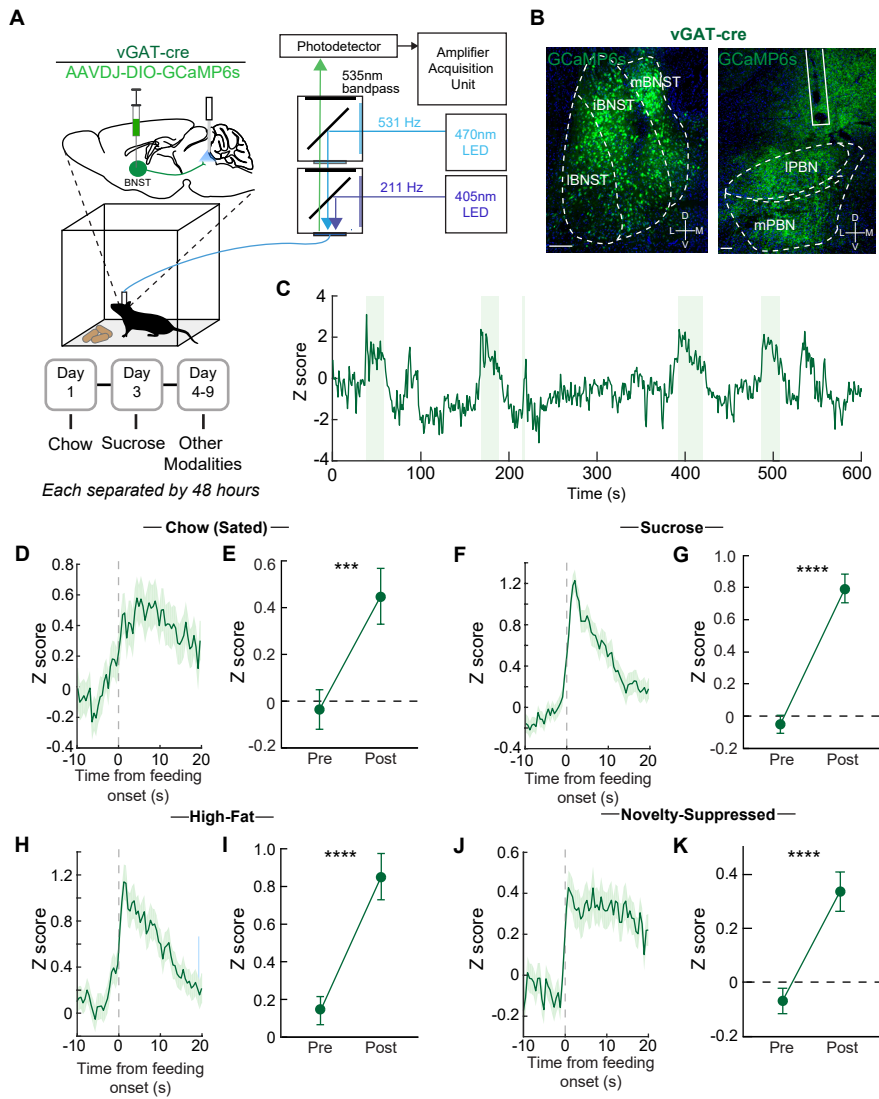

516 **Figure 2. Feeding behavior engages an inhibitory BNST-PBN circuit.**

517 **(A)** Schematic of *in vivo* fiber photometry and behavior.

518 **(B)** Representative GCaMP6s expression in the BNST and PBN of a vGAT-Cre mouse (scale  
519 bars: 100  $\mu$ m BNST, 200  $\mu$ m PBN).

520 **(C)** Representative responses of BNST-PBN<sup>vGAT</sup> terminals during food consumption trials  
521 (shaded areas represent periods of eating).

522 **(D and E)** Average z-scored calcium response of BNST-PBN<sup>vGAT</sup> terminals during consumption  
523 of normal chow under sated conditions (n=57 bouts; 7 mice) and averaged activity of 10-  
524 seconds pre- compared to post- consumption initiation over the testing period.

525 **(F and G)** Average z-scored calcium response of BNST-PBN<sup>vGAT</sup> terminals during consumption  
526 of sucrose (n=93 bouts; 7 mice) and averaged activity of 10-seconds pre- compared to post-  
527 consumption initiation over the testing period.

528 **(H and I)** Average z-scored calcium response of BNST-PBN<sup>vGAT</sup> terminals during consumption of  
529 high-fat (n=77 bouts; 7 mice) and averaged activity of 10-seconds pre- compared to post-  
530 consumption initiation over the testing period.

531 **(J and K)** Average z-scored calcium response of BNST-PBN<sup>vGAT</sup> terminals during consumption  
532 of normal chow under anxiogenic conditions (n=121 bouts; 7 mice) and averaged activity of  
533 10-seconds pre- compared to post- consumption initiation over the testing period.

534 \*\* $p < 0.01$ , \*\*\* $p < 0.001$ , \*\*\*\* $p < 0.0001$ . Error bars indicate SEM.

535 See also Figure S3.

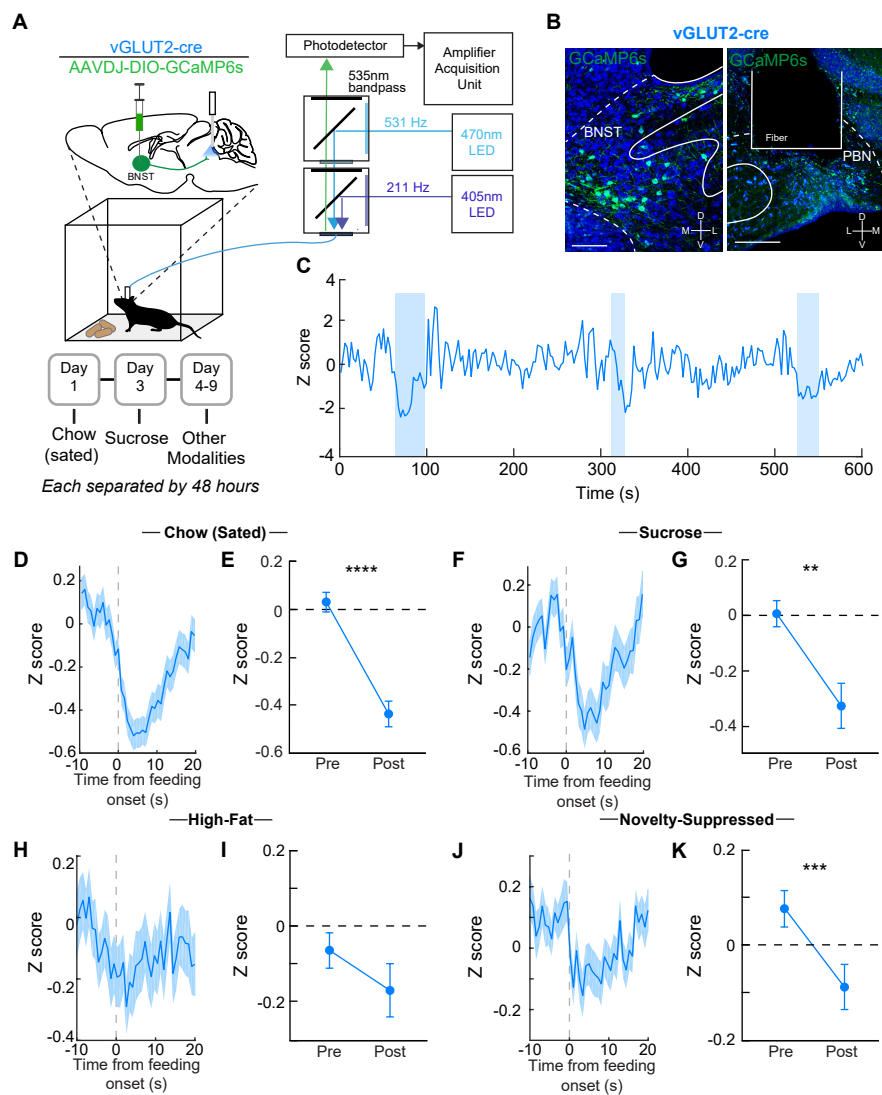

536 **Figure 3. An excitatory BNST-PBN circuit is disengaged during feeding.**

537 **(A)** Schematic of *in vivo* fiber photometry and behavior.

538 **(B)** Representative GCaMP6s expression in the BNST and PBN of a vGLUT2-Cre mouse (scale  
539 bars: 100  $\mu$ m BNST, 200  $\mu$ m PBN).

540 **(C)** Representative responses of BNST-PBN<sup>vGLUT2</sup> terminals during food consumption trials  
541 (shaded areas represent periods of eating).

542 **(D and E)** Average z-scored calcium response of BNST-PBN<sup>vGLUT2</sup> terminals during consumption  
543 of normal chow under sated conditions (n=133 bouts; 6 mice) and averaged activity of 10-  
544 seconds pre- compared to post- consumption initiation over the testing period.

545 **(F and G)** Average z-scored calcium response of BNST-PBN<sup>vGLUT2</sup> terminals during consumption  
546 of sucrose (n=87 bouts; 6 mice) and averaged activity of 10-seconds pre- compared to post-  
547 consumption initiation over the testing period.

548 **(H and I)** Average z-scored calcium response of BNST-PBN<sup>vGLUT2</sup> terminals during consumption  
549 of high-fat (n=56 bouts; 6 mice) and averaged activity of 10-seconds pre- compared to post-  
550 consumption initiation over the testing period.

551 **(J and K)** Average z-scored calcium response of BNST-PBN<sup>vGLUT2</sup> terminals during consumption  
552 of normal chow under anxiogenic conditions (n=77 bouts; 6 mice) and averaged activity of 10-  
553 seconds pre- compared to post- consumption initiation over the testing period.

554 \*\* $p < 0.01$ , \*\*\* $p < 0.001$ , \*\*\*\* $p < 0.0001$ . Error bars indicate SEM.

555 See also Figure S3.



# FIGURE 4

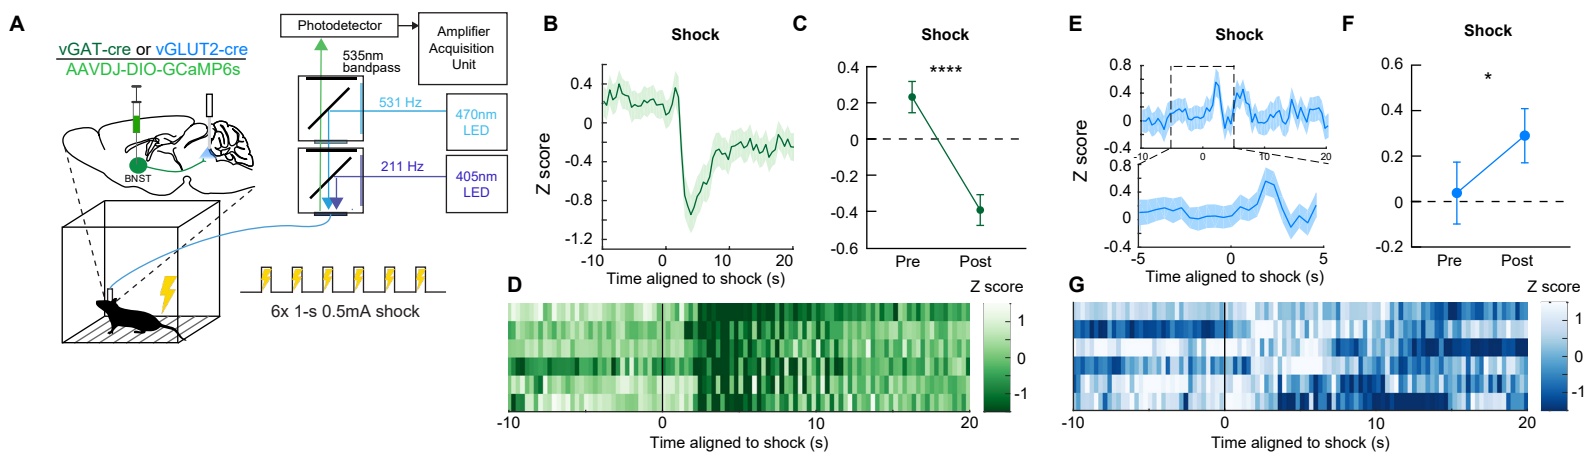

556 **Figure 4. Distinct BNST-PBN circuits display opposing responses to aversive stimuli.**

557 **(A)** Schematic of *in vivo* fiber photometry and behavior.

558 **(B)** Average z-scored calcium transient responses of BNST-PBN<sup>vGAT</sup> terminals to an aversive  
559 shock (n=7 mice).

560 **(C)** Mean z-scored calcium transient responses of BNST-PBN<sup>vGAT</sup> terminals (n=7 mice) 10-  
561 seconds before and after the shock initiation.

562 **(D)** Representative heatmap of BNST-PBN<sup>vGAT</sup> terminal calcium transient activity of a single  
563 mouse during aversive shock presentation.

564 **(E)** Average z-scored calcium transient responses of BNST-PBN<sup>vGLUT2</sup> terminals to an aversive  
565 shock (n=6 mice).

566 **(F)** Mean z-scored calcium transient responses of BNST-PBN<sup>vGLUT2</sup> terminals (n=6 mice) 10-  
567 seconds before and after the shock initiation.

568 **(G)** Representative heatmap of BNST-PBN<sup>vGLUT2</sup> terminal calcium transient activity of a single  
569 mouse during aversive shock presentation.

570 \*\* $p < 0.01$ , \*\*\* $p < 0.001$ , \*\*\*\* $p < 0.0001$ . Error bars indicate SEM.

571 See also Figure S3.

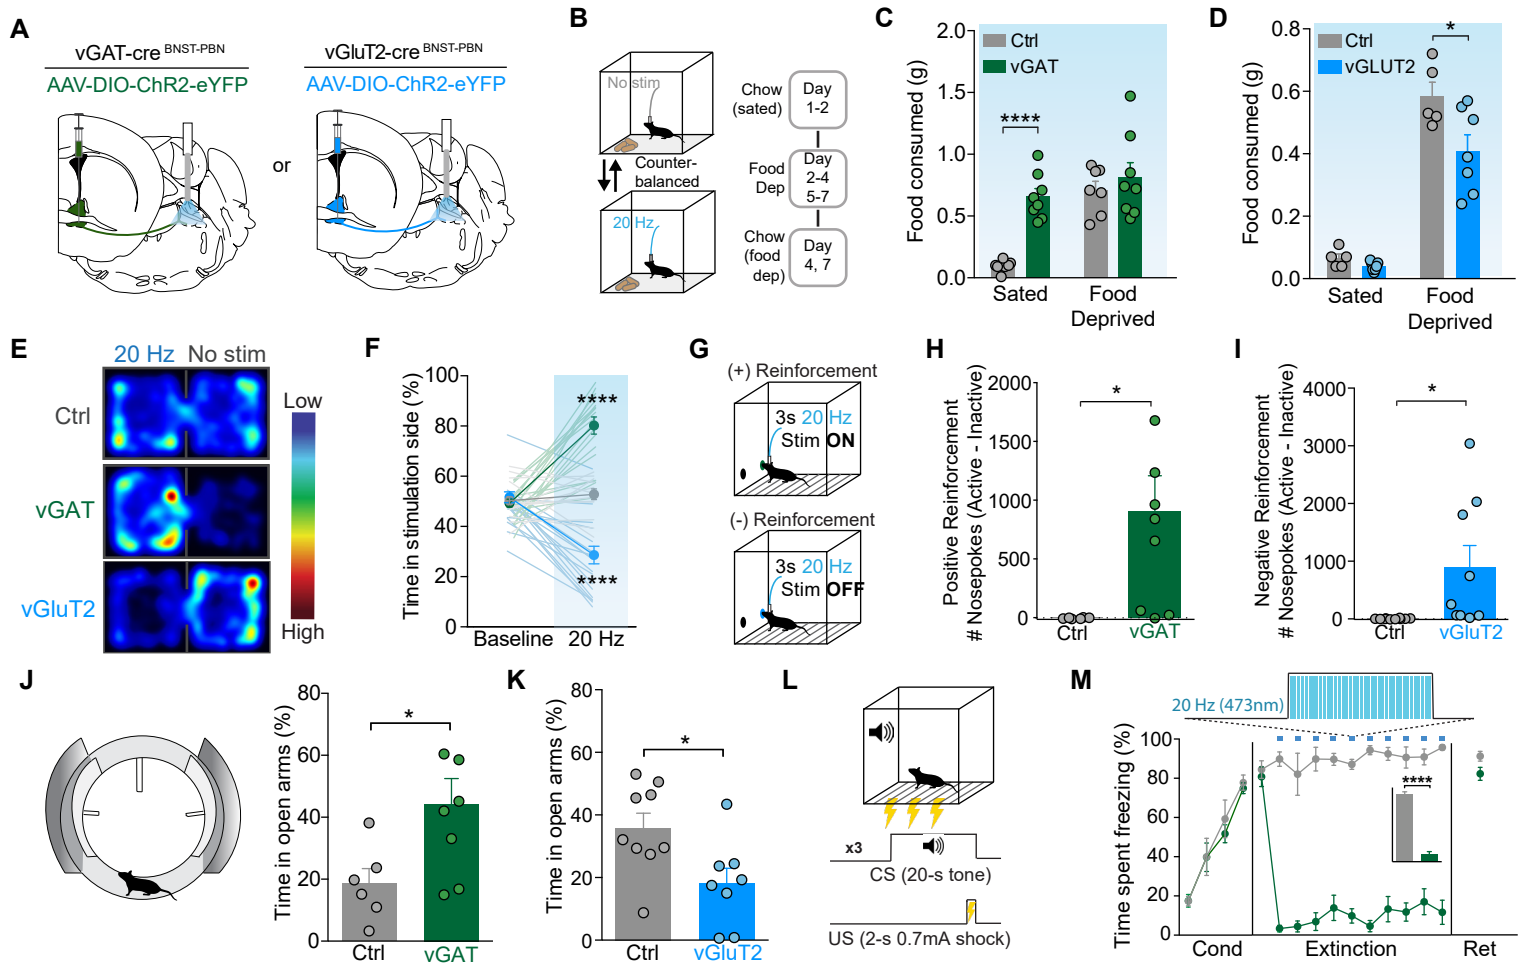

572 **Figure 5. Distinct BNST-PBN circuits drive opposing feeding and affective behaviors.**

573 **(A)** Schematic of optogenetic approach to target BNST-PBN<sup>vGAT</sup> and BNST-PBN<sup>vGLUT2</sup>.

574 **(B)** Schematic of food consumption assay.

575 **(C)** BNST-PBN<sup>vGAT</sup> activation increases consumption of normal chow under sated conditions  
576 (ChR2,  $n = 8$ ; Ctrl,  $n = 7$ ).

577 **(D)** BNST-PBN<sup>vGLUT2</sup> activation decreases consumption of normal chow after food-deprivation  
578 (ChR2,  $n = 7$ ; Ctrl,  $n = 5$ ).

579 **(E)** Representative heatmaps of time spent in the RTPP for Ctrl, BNST-PBN<sup>vGAT</sup>:ChR2, and  
580 BNST-PBN<sup>vGLUT2</sup>:ChR2 mice.

581 **(F)** BNST-PBN<sup>vGAT</sup> activation elicits a real-time place preference, while BNST-PBN<sup>vGLUT2</sup> activation  
582 elicits a real-time place aversion compared to control mice (vGAT:ChR2,  $n = 18$ ;  
583 vGLUT2:ChR2,  $n = 18$ ; Ctrl,  $n = 25$ ).

584 **(G)** Schematic of positive (+) and negative (-) reinforcement tasks for assessment in BNST-  
585 PBN<sup>vGAT</sup>:ChR2 and BNST-PBN<sup>vGLUT2</sup>:ChR2, respectively.

586 **(H)** BNST-PBN<sup>vGAT</sup> activation is positively reinforcing in an operant-self stimulation task (ChR2,  $n$   
587 = 8; Ctrl,  $n = 6$ ).

588 **(I)** BNST-PBN<sup>vGLUT2</sup> activation is negatively reinforcing in an operant task to turn off optogenetic  
589 stimulation (ChR2,  $n = 8$ ; Ctrl,  $n = 6$ ).

590 **(J)** BNST-PBN<sup>vGAT</sup> activation increases time spent in the open arms in the elevated zero maze  
591 (ChR2,  $n = 8$ ; Ctrl,  $n = 6$ ).

592 **(K)** BNST-PBN<sup>vGLUT2</sup> activation decreases time spent in the open arms in the elevated zero maze  
593 (ChR2,  $n = 9$ ; Ctrl,  $n = 8$ ).

594 **(L)** Schematic of the fear conditioning protocol.

595 **(M)** BNST-PBN<sup>vGAT</sup> activation suppresses cued-defensive responses (i.e. freezing) after  
596 conditioning (ChR2,  $n = 8$ ; Ctrl,  $n = 6$ ).

597 \* $p < 0.05$ , \*\* $p < 0.01$ , \*\*\* $p < 0.001$ , \*\*\*\* $p < 0.0001$ . Error bars indicate SEM.

598 See also Figure S4 and S5.

## FIGURE 6

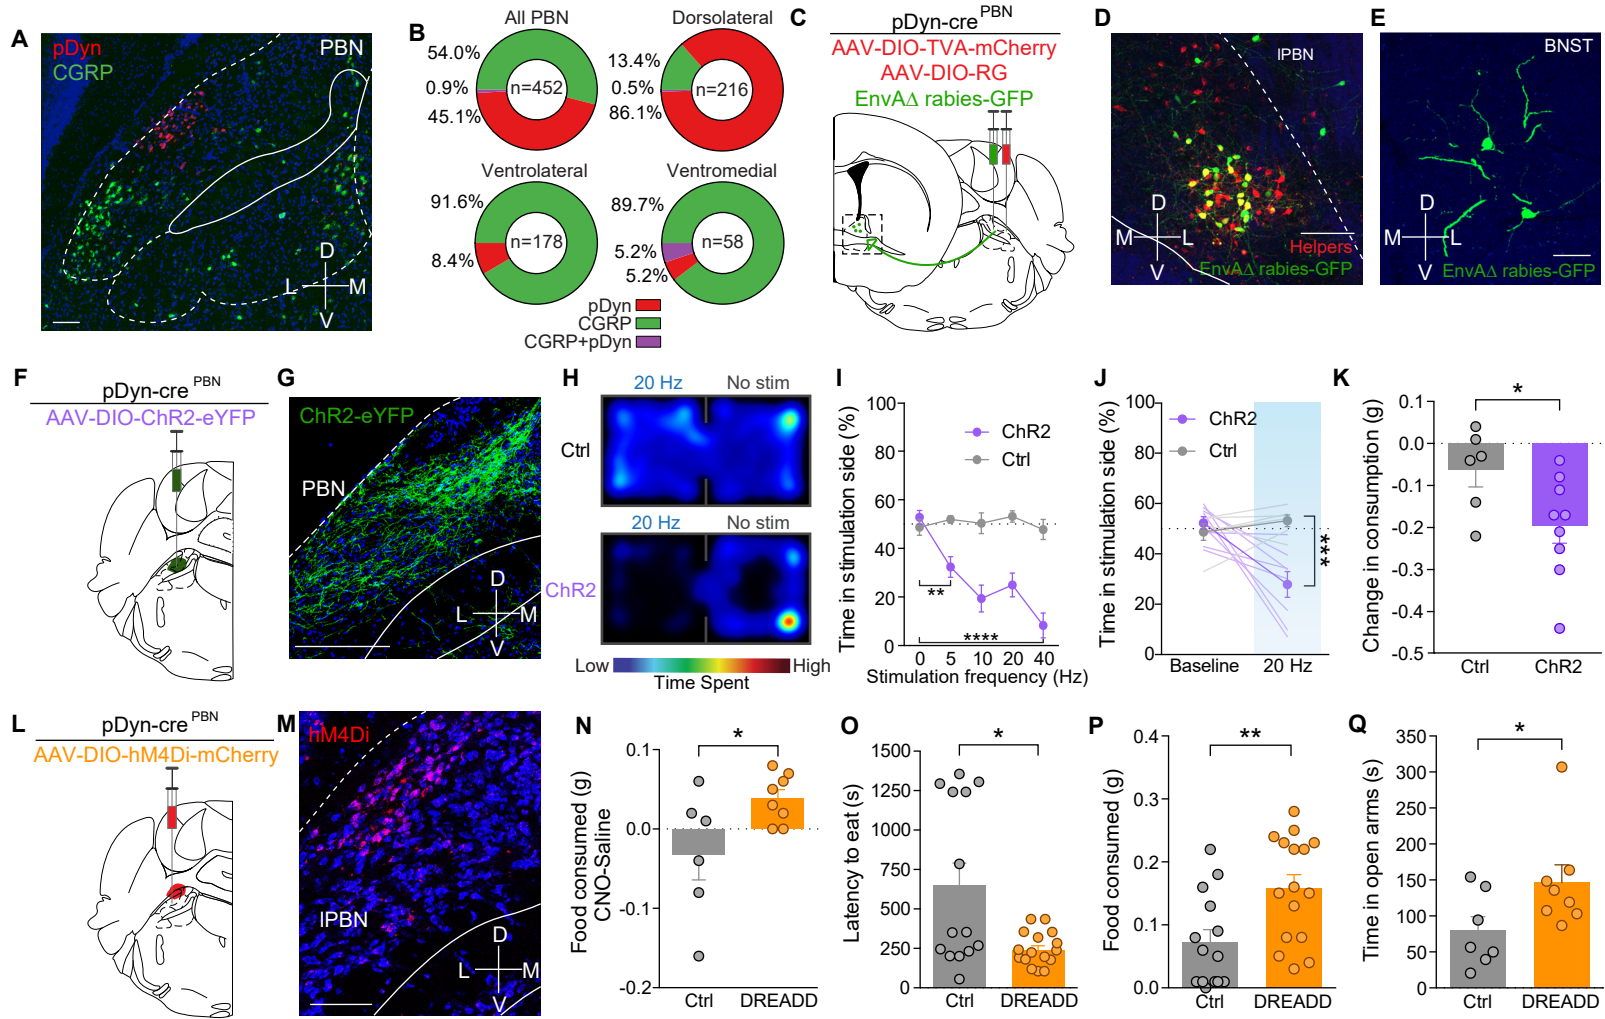

599 **Figure 6. Dynorphin-expressing PBN neurons receive BNST input to bidirectionally**  
600 **modulate feeding and affective behaviors.**

601 **(A)** Fluorescent *in-situ* hybridization of pDyn and CGRP in the PBN (scale bar: 100 $\mu$ m).

602 **(B)** pDyn and CGRP neurons are genetically and anatomically distinct populations in the PBN  
603 (n=452 cells).

604 **(C)** Viral schematic for rabies tracing of monosynaptic inputs to PBN<sup>pDyn</sup> neurons.

605 **(D)** Starter cells in the PBN expressing TVA-mCherry and rabies-GFP (scale bar: 100  $\mu$ m).

606 **(E)** and their corresponding input cells in the BNST (scale bar: 50  $\mu$ m).

607 **(F)** Schematic of optogenetic approach to target PBN<sup>pDyn</sup> neurons.

608 **(G)** Chr2-eYFP expression in PBN<sup>pDyn</sup> neurons (scale bar: 200  $\mu$ m).

609 **(H)** Representative heatmaps of time spent in the RTPP for Ctrl and PBN<sup>pDyn</sup>:Chr2 mice.

610 **(I and J)** PBN<sup>pDyn</sup> activation elicits a real-time place aversion in a **(I)** frequency-dependent manner  
611 including at **(J)** 20 Hz (Chr2, n = 8; Ctrl, n = 6).

612 **(K)** PBN<sup>pDyn</sup> activation decreases food consumption after food-deprivation (Chr2, n = 8; Ctrl, n =  
613 6).

614 **(L)** Schematic of chemogenetic approach to target PBN<sup>pDyn</sup> neurons.

615 **(K)** hM4Di -mCherry expression in PBN<sup>pDyn</sup> neurons (scale bar: 100 $\mu$ m).

616 **(N-Q)** Chemogenetic inhibition of PBN<sup>pDyn</sup> neuron increases **(N)** food consumption, **(O)** decreases  
617 latency to eat and **(P)** while increasing food consumed in a novelty-suppressed feeding task  
618 and **(Q)** time spent in the open arms of elevated zero maze (DREADD, n = 7-8; Ctrl, n = 6-7).

619 \* $p < 0.05$ , \*\* $p < 0.01$ , \*\*\* $p < 0.001$ , \*\*\*\* $p < 0.0001$ . Error bars indicate SEM.

620 See also Figure S6.

1 **Methods**

2 **Key Resources Table**

3

| REAGENT or RESOURCE                                  | SOURCE                                         | IDENTIFIER  |
|------------------------------------------------------|------------------------------------------------|-------------|
| <b>Antibodies</b>                                    |                                                |             |
| <b>Bacterial and Virus Strains</b>                   |                                                |             |
| retroAAV2-EF1a-DIO-hChR2-(H134R)-eYFP                | WashU HOPE Center Viral Core                   | N/A         |
| AAV5-EF1a-DIO-hChR2-(H134R)-eYFP                     | WashU HOPE Center Viral Core                   | N/A         |
| retroAAV2-231-TRAP-Cre-On                            | WashU HOPE Center Viral Core                   | N/A         |
| AAV-DJ-EF1a-DIO-GCaMP6s                              | Stanford University Gene Vector and Viral Core | N/A         |
| AAV5-EF1a-DIO-Arch3.0-eYFP                           | UNC Vector Core                                | N/A         |
| AAV5-Ef1a-DIO-hM4D(Gi)-mCherry                       | UNC Vector Core                                | N/A         |
| AAV5-CAG-FLEX-RG                                     | UNC Vector Core                                | N/A         |
| AAV8-EF1a-FLEX-TVA-mCherry                           | UNC Vector Core                                | N/A         |
| EnvA-G-Deleted Rabies-eGFP                           | Salk                                           | N/A         |
| <b>Chemicals, Peptides, and Recombinant Proteins</b> |                                                |             |
| Clozapine-N-Oxide (CNO)                              | Sigma-Aldrich                                  | Cat#C0832   |
| NeuroTrace 435/455 Blue Fluorescent Nissl Stain      | ThermoFisher Scientific                        | Cat# N21479 |
| VECTASHIELD Hardset Antifade Mounting Medium         | Vector Laboratories                            | Cat#H-1400  |
| <b>Critical Commercial Assays</b>                    |                                                |             |
| RNAscope Fluorescent Multiplex Kit 2.0               | Advanced Cell Diagnostics                      | Cat#320850  |
| Wash Buffer Reagents                                 | Advanced Cell Diagnostics                      | Cat#310091  |
| Protease III & IV Reagents                           | Advanced Cell Diagnostics                      | Cat#322340  |
| CGRP ( <i>Calca</i> )                                | Advanced Cell Diagnostics                      | Cat#420361  |
| Pdyn                                                 | Advanced Cell Diagnostics                      | Cat#318771  |
| vGAT ( <i>Slc32a1</i> )                              | Advanced Cell Diagnostics                      | Cat#319191  |
| vGLUT2 ( <i>Slc17a6</i> )                            | Advanced Cell Diagnostics                      | Cat#319171  |
| eGFP                                                 | Advanced Cell Diagnostics                      | Cat#400281  |



|                                                                        |                                        |                                                                                                                                                                                         |
|------------------------------------------------------------------------|----------------------------------------|-----------------------------------------------------------------------------------------------------------------------------------------------------------------------------------------|
| Adcyap1                                                                | Advanced Cell Diagnostics              | Cat#405911                                                                                                                                                                              |
| Sstr3                                                                  | Advanced Cell Diagnostics              | Cat#460621                                                                                                                                                                              |
| Tac2                                                                   | Advanced Cell Diagnostics              | Cat#446391                                                                                                                                                                              |
| Calcr                                                                  | Advanced Cell Diagnostics              | Cat#494071                                                                                                                                                                              |
| <b>Deposited Data</b>                                                  |                                        |                                                                                                                                                                                         |
| RNA sequencing                                                         | GEO                                    | GSE133484                                                                                                                                                                               |
| <b>Experimental Models: Organisms/Strains</b>                          |                                        |                                                                                                                                                                                         |
| Mouse: vGAT-IRES-Cre<br>( <i>Slc32a1</i> <sup>tm2(cre)Lowl</sup> /J)   | The Jackson Laboratory                 | Stock #016962                                                                                                                                                                           |
| Mouse: vGLUT2-IRES-Cre<br>( <i>Slc17a6</i> <sup>tm2(cre)Lowl</sup> /J) | The Jackson Laboratory                 | Stock # 016963                                                                                                                                                                          |
| Mouse: <i>Pdyn</i> <sup>tm1.1(cre)Mjkr</sup> /J                        | The Jackson Laboratory                 | Stock #027958                                                                                                                                                                           |
| <b>Software and Algorithms</b>                                         |                                        |                                                                                                                                                                                         |
| Image processing, cell counter module                                  | ImageJ/Fiji                            | <a href="https://imagej.net/Fiji">https://imagej.net/Fiji</a>                                                                                                                           |
| Graphpad Prism 6.0 and 8.0                                             | GraphPad Software                      | <a href="https://www.graphpad.com/scientificsoftware/prism/">https://www.graphpad.com/scientificsoftware/prism/</a>                                                                     |
| Illustrator CS6                                                        | Adobe                                  | <a href="https://www.adobe.com/products/illustrator.html">https://www.adobe.com/products/illustrator.html</a>                                                                           |
| EthoVision XT 10                                                       | Noldus                                 | <a href="https://www.noldus.com/animal-behavior-research/products/ethovision-xt">https://www.noldus.com/animal-behavior-research/products/ethovision-xt</a>                             |
| MATLAB                                                                 | MathWorks                              | <a href="https://www.mathworks.com/">https://www.mathworks.com/</a>                                                                                                                     |
| pClamp 10<br>(Clampfit,Clampex)                                        | Molecular Devices                      | <a href="https://www.moleculardevices.com/systems/conventional-patch-clamp/pclamp-10-software">https://www.moleculardevices.com/systems/conventional-patch-clamp/pclamp-10-software</a> |
| R                                                                      | R Foundation for Statistical Computing | <a href="https://www.r-project.org">https://www.r-project.org</a>                                                                                                                       |
| Leica LAS X                                                            | Leica Microsystems                     | <a href="https://www.leica-microsystems.com/products/microscope-software/p/leica-las-x-ls/">https://www.leica-microsystems.com/products/microscope-software/p/leica-las-x-ls/</a>       |

|                         |                      |                                                                                                                                                           |
|-------------------------|----------------------|-----------------------------------------------------------------------------------------------------------------------------------------------------------|
| Med-PC V Software Suite | Med-Associates, Inc. | <a href="https://www.med-associates.com/med-pc-v/">https://www.med-associates.com/med-pc-v/</a>                                                           |
| STAR                    | Doblin et al., 2013  | <a href="https://code-google-com.ezp-prod1.hul.harvard.edu/archive/p/rna-star/">https://code-google-com.ezp-prod1.hul.harvard.edu/archive/p/rna-star/</a> |

4

## 5 **Contact for Reagent and Resource Sharing**

6 Further information and requests for resources and reagents should be directed to and will be  
7 fulfilled by the Lead Contact, Dr. Michael Bruchas (mbruchas@uw.edu).

8

## 9 **Experimental Model and Subject Details**

10

### 11 **Animals**

12

13 Adult male vGAT-IRES-Cre (*Slc32a1<sup>tm2(cre)Lowl</sup>/J*; Jackson Laboratory #016962) (Vong et al.,  
14 2011), vGLUT2-IRES-Cre (*Slc17a6<sup>tm2(cre)Lowl</sup>/J*; Jackson Laboratory # 016963), and  
15 preprodynorphin(*Pdyn*)-IRES-Cre (*Pdyn<sup>tm1.1(cre)Mjkr</sup>/J*; Jackson Laboratory #027958) (Krashes et  
16 al., 2014) mice were group housed, given access to food and water *ad libitum*, and maintained  
17 on a 12:12 hr light:dark cycle (lights on at 7:00 AM). All animals were kept in an isolated and  
18 sound-attenuated holding facility within the lab and adjacent to behavior rooms one week prior to  
19 surgery, post-surgery, and throughout the duration of the behavioral assays to minimize stress.  
20 All procedures were approved by the Animal Care and Use Committee of Washington University  
21 and the University of Washington and conformed to US National Institutes of Health guidelines.

22

### 23 **Method Details**

24

#### 25 **Stereotaxic Surgeries**

26

27 After the animals were acclimated to the holding facility for at least seven days, the mice were  
28 anaesthetized in an induction chamber (2% isoflurane) and placed into a stereotaxic frame (Kopf  
29 Instruments, Model 1900) where they were maintained at 1-2% isoflurane. Mice were then  
30 injected using a blunt needle (86200, Hamilton) at a rate of 100 nL/min with 300-400 nL in the  
31 BNST (AP +0.14, ML  $\pm$ 0.9, DV -4.5) or PBN (AP -5.3, ML  $\pm$ 1.1, DV -3.5); unilateral for optogenetic  
32 activation, tracing, and fiber photometry experiments; bilateral for optogenetic or chemogenetic  
33 experiments. Needle was slowly removed from the brain 10 min after cessation of injection to  
34 allow for diffusion. For fiber photometry experiments, mice were also implanted with a 400- $\mu$ m  
35 fiber optic (Doric Inc., MFC\_400/430-0.48\_MF2.5\_FLT) in the same surgery. Mice recovered for  
36 at least 6 weeks prior to behavioral testing, permitting optimal expression of the virus. For  
37 optogenetic activation and fiber photometry experiments, five weeks after viral injection,  
38 intracranial optic fiber implants were directed above the PBN unilaterally (AP -5.3, ML  $\pm$  1.1, DV  
39 -3.0). For optogenetic inhibition inhibition, fiber optics were placed bilaterally. The fiber optic  
40 implants were secured using two bone screws (CMA, 743102) and affixed with TitanBond  
41 (Horizon Dental Products) and dental cement (Lang Dental).

42

#### 43 **Immunohistochemistry**

44

45 Immunohistochemistry was performed as previously described (McCall et al., 2017). In brief, mice  
46 were anesthetized with sodium pentobarbital and transcardially perfused with 4%  
47 paraformaldehyde (PFA), post-fixed overnight in 4% PFA, and cryo-protected in 30% sucrose for  
48 at least 24 hours. Brains were then sectioned (30  $\mu$ m) and placed in 0.1M PB until  
49 immunohistochemistry. Free-floating sections were washed in 0.1M PBS for 3 x 10 minutes  
50 intervals. Sections were then placed in blocking buffer (0.5% Triton X-100 and 5% natural goat  
51 serum in 0.1 M PBS) for 1 hr at room temperature. After blocking buffer, sections were incubated  
52 in NeuroTrace (1:400, 435/455 blue fluorescent Nissl stain, Invitrogen #N21479) for 1 hour,  
53 followed by 3 x 10 minute 0.1 MPBS then 3 x 10 minute 0.1 M PB washes. After immunostaining,  
54 sections were mounted and coverslipped with Vectashield HardSet mounting medium (Vector  
55 Laboratories) and imaged on a Leica TCS SPE confocal microscope. Animals that did not show  
56 targeted expression were excluded.

57

### 58 **Fluorescent In-Situ Hybridization (FISH)**

59

60 Animals were anesthetized and rapidly decapitated. Brains were quickly removed and fresh  
61 frozen in dry ice, then stored at -80°C. Sections were cut at 20 $\mu$ m, mounted on slides, and stored  
62 at -80°C. Sections were fixed in 4% PFA for 15 min, dehydrated in serial ethanol concentrations  
63 (50%, 70%, and 100%) and processed with RNAscope (Advanced Cell Diagnostics, cat. No.  
64 320293). Sections were hybridized with the probes listed below. Sections were then  
65 counterstained with DAPI and coverslipped. Confocal images were obtained on an Olympus  
66 FV3000RS microscope. Circular ROIs were drawn around each cell, and these ROIs were then  
67 used for co-expression analysis.

68

### 69 **Slice Electrophysiology**

70

71 Acute brain slices were prepared using a protective cutting and recovery method (Ting et al.,  
72 2014). Anesthetized mice infected with AAV5-EF1a-DIO-hChR2-(H134R)-eYFP were  
73 transcardially perfused with NMDG-substituted aCSF containing (in mM) 93 NMDG, 2.5 KCl, 1.25  
74 NaH<sub>2</sub>PO<sub>4</sub>, 30 NaHCO<sub>3</sub>, 20 HEPES, 25 glucose, 5 ascorbic acid, 2 thiourea, 3 Na-pyruvate, 12  
75 N-acetyl-L-cysteine, 10 MgSO<sub>4</sub>, 0.5 CaCl<sub>2</sub> (pH = 7.3-7.4). 200  $\mu$ m thick coronal sections of the  
76 PBN were cut using a Vibratome VT1000s (Leica) and transferred to an oxygenated recovery  
77 chamber containing NMDG aCSF for 5–10 min at 32°C –34°C before being transferred to a  
78 holding chamber filled with modified aCSF containing (in mM) 92 NaCl, 2.5 KCl, 1.2 NaH<sub>2</sub>PO<sub>4</sub>,  
79 30 NaHCO<sub>3</sub>, 20 HEPES, 25 glucose, 2 CaCl<sub>2</sub>, 2 MgCl<sub>2</sub> (pH adjusted to 7.3-7.4 with NaOH), and  
80 Osm 290-310. Whole-cell patch-clamp recordings were made using fire-polished glass pipettes  
81 with a resistance of 3-5 M $\Omega$  filled with (in mM): 120 K<sup>+</sup> gluconate, 5 NaCl, 2 MgCl<sub>2</sub>, 0.1 CaCl<sub>2</sub>,  
82 10 HEPES, 1.1 EGTA, 4 Na<sub>2</sub>ATP, 0.4 Na<sub>2</sub>GTP, 15 phosphocreatine; pH adjusted to 7.3 with  
83 KOH, 291 mOsm. BNST axonal projections in the PBN were visualized through a 40x objective  
84 using IR-DIC microscopy on an Olympus BX51 microscope, and neurons with YFP<sup>+</sup> axons in  
85 close proximity were identified using epifluorescent illumination. Recordings were made with  
86 Patchmaster software controlling a HEKA EPC10 amplifier. Following gigaseal formation and  
87 stable whole-cell access, currents elicited by 10 ms-pulse stimulation of ChR2-containing axonal  
88 terminals and isolated by blocking AMPA/KARs (10  $\mu$ M NBQX, Abcam), NMDARs (50  $\mu$ M D-APV,  
89 Abcam), GABAARs (100  $\mu$ M picrotoxin and 50  $\mu$ M bicuculline, Abcam) through bath application  
90 of the antagonists in aCSF solution. Neurons were voltage clamped at -70 mV for eEPSCs and 0  
91 mV for eIPSCs. Input resistance was monitored to maintain cells with a stable R<sub>s</sub> < 35 M $\Omega$ , and  
92 only these neurons were included in our analysis. eIPSC and eEPSC amplitudes were averaged  
93 across 5 sweeps per cell.

94

### 95 **Translating Ribosome Affinity Purification (TRAP)**

96

97 In order to specifically capture transcribed RNA from GABAergic and glutamatergic  
98 neurons synapsing on the PBN, we generated an adenoviral vector encoding a floxed fusion GFP-  
99 ribosomal protein (RPL10A), and packaged it into the retrofecting AAV serotype rAAV2-retro  
100 (Tervo et al., 2016). This design restricts expression of the GFP•RPL10A fusion to a target (Cre-  
101 expressing) cell type, and further restricts expression to cells of that type synapsing onto the  
102 transduced region.

103 In order to selectively capture transcripts from those excitatory and inhibitory neurons in  
104 the BNST synapsing onto the PBN, we delivered the floxed eGFP•Rpl10a retro-AAV2 into the  
105 PBN of adult male mice ages 4m-10m expressing Cre recombinase under a glutamatergic  
106 (vGLUT2) or GABAergic (vGAT) neuron-specific promoter. At least 6 weeks were given for  
107 surgical recovery and transgene expression before mice were sacrificed for brain dissection,  
108 homogenization, and GFP-targeted immunoprecipitation.

109 In order to control for stress and circadian effects on BNST transcripts between replicates,  
110 mice to be sacrificed were always retrieved between 10AM and 12PM immediately before deep  
111 anesthetization by isoflurane, followed by rapid removal of the brain. A 1mm coronal slab of brain  
112 tissue was collected from AP  $\pm 0.5$  mm, ML  $\pm 1.2$ mm, DV -3.8 to -4.8mm and microdissected in ice  
113 cold PBS containing RNase inhibitors (rRNasin, Superasin), 500  $\mu$ M DTT, and cycloheximide (to  
114 arrest translation in progress to keep ribosomes associated with their RNAs for later capture).  
115 Three dissected BNSTs were pooled per replicate in order to minimize effects of dissection and  
116 incidental injection of structures adjacent to PBN. Pooled tissue was homogenized and processed  
117 using the standard TRAP protocol as previously described (Rieger et al., 2018). All RNA samples  
118 were quality checked for RINe (estimated RNA integrity number) on an Agilent TapeStation 4200  
119 (Agilent Technologies, Santa Clara, California) using the High-Sensitivity RNA Assay Kit. All  
120 sequenced samples had a RINe of  $> 7.5$  with total mass yielded per sample ranging from 2.5 ng  
121 to 250ng.

122 RNA samples were submitted to Washington University in St Louis' Genome Technology  
123 Access Center for library preparation and mRNA sequencing. cDNAs were synthesized using  
124 polyA capture (DynaL mRNA Direct Kit, Life Technologies, Carlsbad, California). cDNAs were  
125 synthesized by polyA-targeted priming, followed by cDNA amplification using the Clontech  
126 SMARTer kit (Takara Bio, Mountain View, CA).

127 Single-read, 50bp RNA-seq of IP fractions and total homogenate from 5 replicates per cell  
128 type (20 samples total) was performed on a single lane of a HiSeq 3000 (Illumina, San Diego,  
129 California), yielding  $\sim 350$ M reads, ranging from 10M to 25M per sample. Reads were processed  
130 using a standard pipeline of read trimming with Trimmomatic (Bolger et al., 2014), removal of  
131 rRNA reads using BowTie (Langmead et al., 2009), and alignment to mouse genome build 38.p5  
132 along with gene-level feature counts using STAR aligner (Dobin et al., 2013).

133 Samplewise read counts were first subsetted to those reads with a normal distribution in  
134 order to perform downstream differential expression analysis, as recommended for analyses in  
135 EdgeR (McCarthy et al., 2012; Robinson et al., 2010). Gene counts were then quality-checked by  
136 hierarchical clustering to rule out batch effects and off-target cell enrichment. One replicate  
137 clustered separately from all other samples and was excluded. Additional quality checks included  
138 plotting relative enrichment / depletion of vGAT/vGLUT2-specific marker genes and that of off-  
139 target cell types (e.g. astrocytes and oligodendrocytes). Ultimately, 3 replicates for vGLUT2  
140 neurons and 2 replicates for vGAT neurons were used for analysis.

141 Differential expression analysis was performed in EdgeR using the following model for  
142 single-cell type enriched transcripts, where group was vGLUT2 IP, vGLUT2 input, vGAT IP, or  
143 vGAT input:

144 Expression  $\sim 0 + \text{group}$

145 Enrichment in cell types was then determined using EdgeR's glmQLFtest function using  
146 contrasts of vGLUT2 Enriched = (vGLUT2 IP) - (vGLUT2 Input) and likewise for vGAT.

147 Differential expression analysis between cell types was performed using the same model  
148 as above but with a contrast of (vGLUT2-vGAT Differential Expression) = (vGLUT2 IP – vGLUT2  
149 Input) – (vGAT IP – vGAT Input). This contrast thus regresses potential effects of dissection  
150 heterogeneity before comparing the target immunoprecipitated cell types. The supplementary  
151 data (**Table S2-S5**) contains differential expression results for all of the contrasts described  
152 above, as well as an additional contrast between immunoprecipitates for vGLUT2 and vGAT  
153 without normalizing for input RNAs (that is, vGLUT2-vGAT differential expression, alternate  
154 calculation = vGLUT2 IP – vGAT IP). Raw data can be found in the NCBI Gene Expression  
155 Omnibus (GEO) database (GSE133484).

156

## 157 **Behavior**

158

159 Behavioral assays were performed in sound attenuated rooms maintained at 23°C. Lighting was  
160 measured and stabilized at ~100 lux for anxiety testing in vGAT-Cre experiments, ~20 lux for  
161 anxiety testing in vGlut-Cre experiments, and ~200 lux for place testing. All behavioral  
162 apparatuses were cleaned with 70% ethanol in between animals. Movements were video  
163 recorded and analyzed using Ethovision Software or recorded with Media Recorder.

164

### 165 *Real-Time Place Preference (RTPP)*

166 Mice were placed into a custom-made unbiased, balanced two-compartment conditioning  
167 apparatus (52.5 x 25.5 x 25.5 cm) as previously described (McCall et al., 2017) and allowed to  
168 freely roam the entire apparatus for 30 min. Entry into one compartment triggered constant  
169 photostimulation (0-40 Hz; 5-10 mW light power) while the animal remained in the light-paired  
170 chamber. Entry into the other chamber ended the photostimulation. The side paired with  
171 photostimulation was counterbalanced across mice. Time spent in each chamber and total  
172 distance traveled for the entire 30 min trial was measured using Ethovision 8.5 (Noldus). Data are  
173 expressed as mean +/- S.E.M percent time spent in photostimulation-paired chamber.

174

### 175 *Operant Conditioning: Positive Reinforcement*

176 For positive reinforcement induced by vGAT-containing BNST-PBN projections, mice with optical  
177 fibres implanted above the PBN were trained in one 1-hr session to nose poke on a fixed-ratio 1  
178 schedule for optical self-stimulation (3-s, 20-Hz, ~10 mW, 473nm) in a mouse operant chamber  
179 (17.8 x 15.2 x 18.4 cm; Med Associates) (Jennings et al., 2013). The following day, the mice were  
180 run again with the same conditions and the number of nosepokes recorded in the hour session  
181 was recorded.

182

### 183 *Operant Conditioning: Negative Reinforcement*

184 For negative reinforcement induced by vGLUT2-containing BNST-PBN projections, mice with  
185 optical fibres implanted above the PBN were trained in one 1-hr session to nose poke on a fixed-  
186 ratio 1 schedule to turn off optical self-stimulation in a mouse operant chamber (17.8 x 15.2 x 18.4  
187 cm; Med Associates). Constant photostimulation (20-Hz, ~10 mW, 473nm) began at the start of  
188 each session. Each nose poke resulted in the cessation of the photostimulation for 3-s. The  
189 following day, the mice were run again with the same conditions. The number of nosepokes  
190 recorded in the hour session was recorded. About 50% of Cre+ mice did not learn the operant  
191 task and thus were excluded from the results as non-responders (**Fig. S7F**). Non-responders  
192 were classified as animals whose difference of responses between active and inactive was < 5.

193

### 194 *Threat Conditioning*

195 Pavlovian threat conditioning was performed in Med Associates Fear Conditioning  
196 Chambers (NIR-022MD). This equipment consisted of a conductive grid floor inside a 29.53 cm  
197 L x 23.5 cm W x 20.96 cm H chamber inside of a soundproof box lit by an infrared light.

198 vGAT-Cre experiments: Mice were conditioned to four 20s tones co-terminating with 2-s  
199 0.7mA shocks on Day 1. On Day 2, mice were placed back into the chamber. Eleven tone  
200 presentations in the absence of shock were presented. During the first tone, no optostimulation  
201 occurred. During the next ten tone presentations, 20 Hz blue light was delivered. On the third day,  
202 we assessed extinction recall by placing the mice into the chamber and presented the tone once.  
203 Freezing behavior was measured during all tone presentations.

204 All fiber photometry animals were conditioned to 6 20-second tones terminating with a 1-  
205 s 0.5mA shock.

### 206 *Feeding Assays*

208 Feeding assays were performed in a square plexiglass arena (27 cm × 27 cm). Chow,  
209 High-fat, sucrose, or salt pellets (Envigo) were placed in the corner of the arena. Mice were then  
210 introduced into the arena for 30 min. To record the amount of food consumed, pellets were  
211 measured before and after the assay. Baseline feeding and feeding whilst photostimulation (20  
212 Hz; 5-10 mW light power) or photoinhibition (constant; ~5 mW light power) were performed in a  
213 counterbalanced fashion across mice.

214 In addition to counterbalanced experiments across days, we also performed within-  
215 session manipulations to assess whether the effects are immediately reversible. Mice were  
216 introduced into the arena for 60 minutes: 20 min pre-stimulation, 20 min 20 Hz stimulation or  
217 constant inhibition, and 20 min post-stimulation. Food weight was measured at each 20 min point  
218 (**Fig. S5J, S7E, S8E**).

### 219 *Elevated Zero Maze*

221 EZM testing was performed as described previously (McCall et al., 2017) , the EZM  
222 (Harvard Apparatus) was made of grey plastic, 200 cm in circumference, comprised of four 50 cm  
223 sections (two opened and two closed). The maze was elevated 50 cm above the floor and had a  
224 path width of 4 cm with a 0.5 cm lip on each open section. Mice were connected to fiber optic  
225 cables, positioned head first into a closed arm, and allowed to roam freely for 7 min. Animals  
226 received 20 Hz (10 ms pulse width) photostimulation (5-10 mW light power). Open arm time was  
227 the primary measure of anxiety-like behavior.

### 228 **Fiber Photometry**

231 Fiber photometry recordings were performed as previously described (Parker et al., 2019).  
232 Briefly, an optic fiber was attached to the implanted fiber by a ferrule sleeve, then GCaMP6s was  
233 stimulated by two LEDs, a 531-Hz sinusoidal light (Thorlabs M470F3), bandpass filtered at  $470 \pm$   
234  $20\text{nm}$ , and a 211-Hz sinusoidal light (Thorlabs M405FP1), bandpass filtered at  $405 \pm 10\text{nm}$ . (Filter  
235 cube: Doric FMC4; LED driver: DC4104). The 470 nm signal evokes  $\text{Ca}^{2+}$ -dependent emission,  
236 while the 405 nm signal evokes  $\text{Ca}^{2+}$ -independent isobestic control emission. Prior to recording,  
237 a 180s period of GCaMP6s excitation with both light channels was used to remove the majority  
238 of baseline drift. Laser intensity at the optic fiber tip was adjusted to  $\sim 50 \mu\text{W}$  before each day of  
239 recording. GCaMP6s fluorescent signal was isolated by bandpass filtering ( $525 \pm 25\text{nm}$ ),  
240 transduced by a femtowatt silicon photoreceiver (Newport 2151), and recorded by a real-time  
241 processor (TDT RZ5P). The envelopes of 531 Hz and 211 Hz signals were extracted in real time  
242 by the TDT program Synapse at a sampling rate of 1017.25 Hz.

243 Fiber recordings were analyzed using custom MATLAB scripts available on Github. Motion  
244 artifacts were removed by subtracting the isobestic 405 nm signal from the 470 nm excitation  
245 signal. Baseline drift due to slow photobleaching artifacts was corrected by fitting a double  
246 exponential curve to the raw trace, then the photometry trace was z-scored relative to the mean  
247 and standard deviation of the signal. The mean z-score during the ten seconds preceding and  
248 following an event were compared using paired t tests.

249

## 250 **Statistical analyses**

251

252 All summary data are expressed as mean  $\pm$  SEM. Statistical significance was taken as \* $p < 0.05$ ,  
253 \*\* $p < 0.01$ , \*\*\* $p < 0.001$ , \*\*\*\* $p < 0.0001$ , as determined by the Student's t-test (paired and  
254 unpaired): One-Way Analysis of Variance (ANOVA) or One-Way Repeated Measures ANOVA,  
255 followed by Bonferroni post hoc tests as appropriate. Statistical analyses were performed in  
256 GraphPad Prism 6.0 or 8.0. All statistical information is listed in **Table S1**.

257

## 258 **Data and Code Availability**

259

260 RNA sequencing data from Figure 1 have been deposited and are available from GEO  
261 (Accession: GSE133484). Custom MATLAB analysis code was created to appropriately organize,  
262 process, and combine photometry recording data with associated behavioral data. Analysis code  
263 for photometry from Figures 2, 3, and 4 is available online at <https://www.github.com/BruchasLab>.  
264 The full behavioral dataset supporting the current study are available from the corresponding  
265 author upon request.
